1 **Title**

2 Cell types and clonal relations in the mouse brain revealed by single-cell and spatial  
3 transcriptomics

4

5 **Author list**

6 Michael Ratz<sup>1</sup>, Leonie von Berlin<sup>1</sup>, Ludvig Larsson<sup>2</sup>, Marcel Martin<sup>3</sup>, Jakub Orzechowski  
7 Westholm<sup>3</sup>, Gioele La Manno<sup>4,5</sup>, Joakim Lundeberg<sup>2</sup> and Jonas Frisén<sup>1</sup>

8

9 **Affiliations**

10 <sup>1</sup> Department of Cell and Molecular Biology, Karolinska Institute, 171 77 Stockholm, Sweden

11 <sup>2</sup> Science for Life Laboratory, KTH Royal Institute of Technology, 106 91, Stockholm, Sweden

12 <sup>3</sup> Department of Biochemistry and Biophysics, National Bioinformatics Infrastructure Sweden,  
13 Science for Life Laboratory, Stockholm University, Box 1031, 17 121 Solna, Sweden

14 <sup>4</sup> Department of Medical Biochemistry and Biophysics, Karolinska Institute, 171 77  
15 Stockholm, Sweden

16 <sup>5</sup> Current affiliation: Swiss Federal Institute of Technology Lausanne (EPFL), Lausanne,  
17 Switzerland

18

19

20 Address correspondence to Jonas Frisén, [Jonas.frisen@ki.se](mailto:Jonas.frisen@ki.se), +46704451142

21 **Summary**

22 The mammalian brain contains a large number of specialized cells that develop from a thin  
23 sheet of neuroepithelial progenitor cells<sup>1,2</sup>. Recently, high throughput single-cell technologies  
24 have been used to define the molecular diversity of hundreds of cell types in the nervous  
25 system<sup>3,4</sup>. However, the lineage relationships between mature brain cells and progenitor cells  
26 are not well understood, because transcriptomic studies do not allow insights into clonal  
27 relationships and classical fate-mapping techniques are not scalable<sup>5,6</sup>. Here we show *in vivo*  
28 barcoding of early progenitor cells that enables simultaneous profiling of cell phenotypes and  
29 clonal relations in the mouse brain using single-cell and spatial transcriptomics. We  
30 reconstructed thousands of clones to uncover the existence of fate-restricted progenitor cells in  
31 the mouse hippocampal neuroepithelium and show that microglia are derived from few  
32 primitive myeloid precursors that massively expand to generate widely dispersed progeny. By  
33 coupling spatial transcriptomics with clonal barcoding, we disentangle migration patterns of  
34 clonally related cells in densely labelled tissue sections. Compared to classical fate mapping,  
35 our approach enables high-throughput dense reconstruction of cell phenotypes and clonal  
36 relations at the single-cell and tissue level in individual animals and provides an integrated  
37 approach for understanding tissue architecture.

## 38 **Main**

39 The mammalian brain contains a vast number of specialized cell types organized into networks  
40 that perform computations and enable complex cognitive processes. Ever since the discovery  
41 of various cell types in the nervous system, our understanding of cell diversity in the  
42 mammalian brain has been increasingly refined. Modern high-throughput technologies such as  
43 single-cell RNA sequencing (scRNA-seq) revealed the existence of hundreds of molecularly  
44 distinct cell types including diverse types of neurons, astrocytes, oligodendrocytes and  
45 microglia across the entire mouse and human nervous system<sup>3,7-11</sup>. Yet, our molecular  
46 understanding of the developmental origins of cell diversity remains limited and a systematic  
47 analysis of lineage relationships between brain cells is lacking due to the low throughput of  
48 classical fate mapping techniques<sup>5,6</sup>. Advanced molecular tools based on genome editing or  
49 genetic barcoding have been used to record cell lineages<sup>12-17</sup>, and combined with scRNA-seq  
50 to generate fate maps in cultivated cells<sup>18,19</sup>, zebrafish<sup>20-23</sup> and mice<sup>17,19,24,25</sup>. However, these  
51 technologies are not readily employed to uniquely label a large number of neuroepithelial  
52 progenitor cells in the mouse brain *in vivo* and most approaches require tissue dissociation.  
53 Establishing a system that allows genetic barcoding at large scale with an *in situ* whole  
54 transcriptome readout is crucial for studies of the nervous system where function arises from  
55 both differential gene expression and circuit-specific anatomy<sup>26-29</sup>.

56 Here we describe TREX, a robust and high-throughput approach that allows for simultaneous  
57 clonal tracking and expression profiling of mouse brain cells and Space-TREX, which utilizes  
58 spatial transcriptomics coupled to immunohistochemistry for tracking clonally related cells in  
59 their native environment in tissue sections. Both methods are based on the intraventricular  
60 injection of a diverse lentivirus library into the neural tube of the mouse embryo to deliver a  
61 compact, heritable and ubiquitously expressed genetic barcode into precursor cells. We applied  
62 TREX to study the lineage potential of early neuroepithelial cells and revealed the existence of  
63 fate-restricted progenitor cells as early as E9.5 for the murine hippocampus. We uncovered that  
64 microglia, the tissue-resident macrophages of the brain, are generated from a limited number  
65 of progenitor cells that undergo massive clonal expansion as well as widespread migration  
66 across multiple regions of the mouse telencephalon. Using Space-TREX, we demonstrate that  
67 migration patterns of progeny from brain progenitor cells can be investigated using spatial  
68 transcriptomics. Together, our findings demonstrate the utility of TREX and Space-TREX for  
69 high-throughput clonal tracing in the mouse brain and provide new tools and molecular insights  
70 to study brain development at the single-cell and tissue level. These techniques are easy to use  
71 with standard laboratory equipment and can be applied to any model organism to study the  
72 development of any tissue of interest.

## 73 Results

### 74 Unique and heritable labelling of progenitor cells with expressed barcodes

75 Here, we present TREX, a lentivirus-based strategy for barcoding of mouse brain progenitors  
76 *in vivo* followed by single-cell transcriptomics for tracking clonal relationships and profiling  
77 gene expression of thousands of brain cells in one assay (**Fig. 1a**). Our approach relies on a  
78 diverse lentivirus library containing random barcodes or cloneIDs with a length of 30 bp  
79 downstream of a nuclear-localized EGFP driven by a strong, ubiquitous EF1a promoter  
80 (**Extended Data Fig. 1a-b**). To ensure high library complexity required for unique labelling  
81 of progenitor cells, we used next generation sequencing of lentivirus preparations (**Extended**  
82 **Data Fig. 1c-f**). We found  $1.57 \times 10^6 \pm 0.12 \times 10^6$  cloneIDs/ $\mu\text{l}$  (mean  $\pm$  SD,  $n = 4$  preparations)  
83 in a typical lentivirus preparation with a largely uniform representation (Gini index = 0.2) and  
84 high sequence diversity (Hamming distance =  $22 \pm 2.4$ ; mean  $\pm$  SD;  $n = 10,000$  random  
85 samples).

86 To label individual progenitor cells *in vivo*, we used *in utero* microinjection of lentivirus into  
87 the ventricular system of the mouse forebrain at embryonic day (E) 9.5 (**Extended Data**  
88 **Fig. 2a**). We typically injected about 0.6  $\mu\text{l}$  of EGFP-cloneID virus corresponding to  $0.94 \times$   
89  $10^6$  unique cloneIDs and quantified the number of barcoded cells two days after virus injection  
90 at E11.5. Analysis of single-cell suspensions from whole brains at E11.5 revealed labelling of  
91  $1.8 \pm 0.25\%$  of cells (mean  $\pm$  SD,  $n = 3$  brains, **Extended Data Fig. 2b**) corresponding to a  
92 total number of  $41,000 \pm 3,500$  cells (mean  $\pm$  SD,  $n = 3$  brains) per E11.5 mouse brain  
93 (**Extended Data Fig. 2b, c**). Because the cell cycle length is around 12 h during this time of  
94 brain development<sup>30</sup>, we estimated that the initial number of labelled progenitor cells at E9.5  
95 was around 2,600 and that 99.6% of cells were uniquely labelled with a cloneID (**Extended**  
96 **Data Fig. 2d**). However, even if more cells were to be barcoded, our lentivirus library is  
97 sufficiently complex to uniquely label 99% of a total of 6,310 cells.

98 Barcoded EGFP+ cells were mostly evenly distributed throughout the E11.5 neuroepithelium  
99 and included Sox2+ radial glia progenitors lining the ventricular zone as well as their Sox2-  
100 daughter cells (**Extended Data Fig. 2e-g**). Long-term EGFP-cloneID expression was  
101 maintained in the juvenile mouse brain and labelled cells were found in various regions such  
102 as the cortex, hippocampus and striatum (**Fig. 1b**). Antibody staining with markers against  
103 major cell types of the brain showed that neurons (Rbfox3/NeuN), astrocytes (Sox9),  
104 oligodendrocytes (Sox10) and microglia (Iba1) were labelled with a heritable cloneID (**Fig.**  
105 **1c**). In conclusion, we present a highly diverse lentivirus library suitable for unique labelling  
106 of mouse brain progenitor cells with barcodes that display long-term expression in all major  
107 cell types of the postnatal brain.

108

## 109 **Single-cell profiling reveals the molecular identity of barcoded brain cells**

110 To analyse the fate potential of barcoded progenitor cells and to determine the molecular  
111 identity of their daughter cells, we applied TREX to cells labelled at E9.5. We dissected brains  
112 from two-week-old mice and used fluorescence-activated cell sorting (FACS) to isolate all  
113 EGFP+ barcoded cells separately from cortex, striatum and hippocampus for scRNA-seq  
114 (**Extended data Fig. 3a-d**). We collected cells from these three regions per brain from five  
115 brains (four barcoded and one non-injected control) and used droplet microfluidics to reveal  
116 the transcriptome profiles of 65,160 cells. Graph-based clustering revealed five main clusters  
117 corresponding to astroependymal cells, immune cells, neurons, oligodendrocytes and vascular  
118 cells (**Extended data Fig. 3e**). Both control and barcoded samples showed a similar cell type  
119 composition with the exception of vascular cells which represented 16.6% of cells in the  
120 control dataset and less than 0.5% of barcoded cells (**Extended data Fig. 3f**). This can be  
121 attributed to the fact that blood vessels only begin to sprout into the ventrolateral brain at E9.5  
122 (ref<sup>31</sup>), which results in a low number of cells that can be labelled at the time point of injection.  
123 We therefore removed the cluster of vascular cells from all datasets and kept a final of 62,388  
124 single-cell profiles with a mean of 5,444 transcripts and 2,255 genes detected per cell  
125 (**Extended data Fig. 3g-l**).

126 Next, we performed subclustering for each major cell type from all brain regions and assigned  
127 each cell subclass a unique mnemonic identifier based on an existing mouse brain atlas<sup>3</sup>  
128 (**Extended data Fig. 4**). In total, we found 40 molecularly defined cell classes with the largest  
129 diversity among neuronal cells which included 17 types of projection neurons, 7 types of  
130 GABAergic interneurons and 3 types of immature neuronal cells (**Fig. 1d**). As expected,  
131 clusters corresponding to glial cell types were less heterogenous and we found 5 subclasses of  
132 astroependymal cells, 5 subclasses of oligodendrocyte lineage cells and 3 subtypes of immune  
133 cells. From the three telencephalic regions sampled we collected the highest number of cells  
134 from cortex (n = 28,188 cells) followed by hippocampus (n = 18,231 cells) and striatum (n =  
135 15,969 cells) (**Fig. 1e**). Certain cell types such as protoplasmic astrocytes (ACTE2, n = 17,441  
136 cells), microglia (MGL1, n = 5,331 cells) or mature oligodendrocytes (MOL1, n = 820 cells)  
137 were found in similar proportions in each region (**Fig. 1f**). However, many cell types were  
138 specific for one region such as dentate gyrus radial glia-like cells in the hippocampus (RGDG,  
139 n = 1,249 cells), medium spiny neurons in the striatum (MSN1, n = 665 cells) and upper layer  
140 projection neurons in the cortex (TEGLU7, n = 497 cells) (**Fig. 1g**). Finally, we compared gene  
141 expression profiles and total cell type composition between barcoded and non-injected samples  
142 which indicated that lentivirus-mediated barcoding does not perturb cell physiology (**Extended**

143 **data Fig. 5).** Together, these data show the utility of TREX for barcoding progenitor cells in  
144 the developing brain and profiling the identity of their barcoded progeny at a postnatal stage  
145 using single-cell RNA-seq.

146

### 147 **Barcode expression metrics across cell types**

148 To specifically study barcoded cells, we removed cells from non-injected control samples from  
149 the full dataset ( $n = 62,388$  cells) and focused on the 49,724 cells isolated from four mouse  
150 brains that were previously injected with an EF1a-EGFP-cloneID virus library (**Fig. 2a**). We  
151 detected EGFP transcripts in a total of 21,743 cells (43.7%) corresponding to 44.9% to 68.5%  
152 ( $57.4\% \pm 10.2\%$ , mean  $\pm$  SD,  $n = 4$  brains) EGFP mRNA positive cells per brain (**Extended**  
153 **Data Fig. 6a, b**). The average number of EGFP transcripts per cell was highest in immune cells  
154 followed by intermediate levels in immature neurons, projection neurons, oligodendrocytes as  
155 well as interneurons and lowest expression levels in astroependymal cells (**Extended Data**  
156 **Fig. 6c**). The number of EGFP transcripts per cell class were correlated ( $r = 0.81$ ) with  
157 Elongation Factor 1-Alpha 1 (*Eef1a1*) levels indicating that transgene expression under the  
158 synthetic EF1a promoter faithfully recapitulates endogenous *Eef1a1* expression patterns albeit  
159 at lower levels (**Extended Data Fig. 6d**).

160 Using a custom pipeline, we extracted cloneIDs directly from single-cell transcriptome data as  
161 well as targeted amplicon libraries (**Extended Data Fig. 7a, b**). We captured a total of 21,433  
162 cloneIDs in 18,570 cells (37.3%) corresponding to 24.2% to 50.9% ( $38.4\% \pm 11.8\%$ , mean  $\pm$   
163 SD,  $n = 4$  brains) of all sampled cells per brain (**Fig. 2b; Extended Data Fig. 7c, d**). We  
164 captured cloneIDs for most of the previously identified 40 cell types except for one very rare  
165 type of interneurons, TEINH18. The average number of cloneIDs per cell was similar when  
166 using scRNA-seq (1.15 cloneIDs per cell on average) or bulk DNA sequencing (1 cloneID per  
167 cell on average) of barcoded cells (**Extended Data Fig. 7e, f**) suggesting that cloneID capture  
168 is quantitative using single-cell transcriptomics.

169 While the vast majority of cloneID+ cells (89.6%) across all brains expressed only one cloneID  
170 (**Fig. 2c**), the proportion of such cells varied between brains and ranged from 78.6% to 95.8%  
171 with the remaining fraction of cells expressing multiple cloneIDs (**Extended Data Fig. 7g, h**).  
172 Based on the transduction rate of 1.8% (see above) and an idealized transduction model<sup>32</sup>, we  
173 expected that 99.08% of cells contain one cloneID and 0.92% of cells contain two or more  
174 cloneIDs (**Extended Data Fig. 7i**). Although we followed a rigorous strategy for doublet  
175 removal (see methods), we were concerned that cells with multiple cloneIDs could correspond  
176 to undetected doublets in our scRNA-seq data. Therefore, we injected multicolour lentiviruses  
177 into the embryonic forebrain and found that 3.4x more cells than expected contained multiple

178 fluorophores ( $n = 1,301$  cells) (**Extended Data Fig. 7j-l**). We found that the observed deviation  
179 from the theoretical cloneID copy number distribution per brain can be attributed to (1) variable  
180 copy numbers per cell type and (2) variable proportions of barcoded cell types in each brain  
181 (**Extended Data Fig. 8**). First, the total fraction of cells expressing multiple cloneIDs ranged  
182 from about 3% in white matter astrocytes (ACTE1) to 16.7% in some excitatory cortical  
183 projection neurons (TEGLU1, TEGLU10) and was highest in immune cell types: 17.9% of  
184 MGL1, 31.2% of PVM1 and 43.2% of MGL3 contained more than one cloneID. The  
185 correlation coefficients between the fraction of cells with multiple cloneIDs and cloneID  
186 expression levels were highly variable ( $-0.96 \leq r \leq 0.97$ ) for each major cell type indicating  
187 that cloneID transcript levels can only partially explain the number of cloneIDs per cell type  
188 (**Extended Data Fig. 9**). Instead, increased transduction rates of local progenitor cells due to  
189 position and/or differential expression of receptors required for lentivirus entry<sup>33</sup> might result  
190 in a higher occurrence of certain cell types harboring more than one cloneID sequence, even at  
191 low transduction rates. For example, the choroid plexus serves as an entry site for microglia  
192 progenitors to first enter the cerebrospinal fluid and then the brain at the ventricular surface<sup>34,35</sup>  
193 and we observed “hot spots” with a higher density of EGFP+ barcoded cells in the ventral and  
194 dorsal regions of the E11.5 neuroepithelium (**Extended Data Fig. 2e**) corresponding to the  
195 developing choroid plexus–cerebrospinal fluid system<sup>34</sup>. Second, each brain contained  
196 different amounts of barcoded cells from certain cell types, e.g. brains 1 and 3 contained more  
197 microglia and less ACTE1 than the other brains leading to variable cloneID copy number  
198 distributions for each brain. In summary, all major brain cell types were represented among  
199 barcoded cells and most cells express a single cloneID with varying copy numbers per cell  
200 type.

201

## 202 **Clonal relationships across forebrain regions**

203 We identified clonally related cells based on the Jaccard similarity of cloneIDs for each pair of  
204 cloneID containing cells<sup>18</sup> and we defined clones as groups of two or more related cells. In  
205 total, we reconstructed 2,360 clones containing 11,569 cells (23.3 % of all cells; **Fig. 2d**) with  
206 an average size of  $4.9 \pm 0.3$  cells per clone (mean  $\pm$  SEM) and the number of clones per brain  
207 ranged from 201 to 1,106 (11.1% to 38.6% of all cells per brain; **Extended Data Fig. 10**).  
208 Interestingly, clones containing mesoderm-derived myeloid cells (microglia and perivascular  
209 macrophages) were about 7.4 times larger than those with neuroectoderm-derived cells and  
210 contained  $29.5 \pm 7.6$  cells per clone (mean  $\pm$  SEM,  $n = 84$  clones, max = 534 cells per clone)  
211 compared to  $4 \pm 0.1$  cells per clone (mean  $\pm$  SEM,  $n = 2,276$  clones, max = 116 cells per clone),

212 respectively (**Fig. 2e**). This difference in clone size probably reflects the massive proliferation  
213 of brain macrophages required to colonize the entire CNS, after only a small number of  
214 precursors enters the brain before closure of the blood-brain barrier around E13, restricting  
215 access to immune cells that arise later in development<sup>36</sup>.

216 To estimate the potential error associated with clone reconstruction, we quantified how often  
217 cell types that arise from different progenitors shared the same cloneID. First, we found that  
218 clones containing cortical excitatory (n = 371 clones) or inhibitory neurons (n = 18 clones),  
219 which are known to have separate developmental origins<sup>37</sup>, never shared the same cloneID  
220 (**Extended Data Fig. 11a**). Second, among 84 clones containing 2,481 mesoderm-derived  
221 microglia or perivascular macrophages only 3 clones with a total of 453 cells shared a cloneID  
222 with 5 neuroectoderm-derived cells (**Extended Data Fig. 11b-d**) and we removed these cells  
223 from the respective clones. These data suggest a low error rate of about 0.2% (5 out of 2481  
224 cells) that could be related to clone size and cell type since only large immune clones (3 clones,  
225 71 to 219 cells per clone) contained neuroectoderm-derived cells or to non-unique cloneID  
226 labelling. Moreover, we found that cloneID removal from cell types that often express more  
227 than one cloneID such as mesoderm-derived cells are affected by “lumping” errors leading to  
228 less clones with a larger size and a higher number of incorrectly associated neuroectoderm-  
229 derived cells (**Extended Data Fig. 12**). This is expected since the co-expression of two or more  
230 distinct cloneIDs per cell leads to a higher combinatorial diversity<sup>18</sup> thus reducing the error  
231 associated with clone reconstruction. Finally, there was a high correlation (r = 0.99) between  
232 barcode frequency and the number of cells with a barcode in distinct clones indicating that  
233 there is no preferential uptake of certain barcodes among progenitor cells leading to uniform  
234 library representation of labelled cells (**Extended Data Fig. 13**).

235 Cell types most often represented in clones were oligodendrocyte subtypes (3,703 cells, 32%)  
236 followed by immune cells (2,476 cells, 21.4%), astroependymal cells (2,443 cells, 21.1%),  
237 immature neuronal cells (2,207 cells, 19.1%), projection neuron types (708 cells, 6.1%) and  
238 interneurons (32 cells, 0.3%) (**Fig. 2f**). Except for one type of interneurons, TEINH19, we  
239 captured clonal information for all cell types that also contained a cloneID. Cell types  
240 containing the highest proportion of cells in clones were cortical and striatal microglia (MGL3)  
241 of which 77.5% and 60.6%, respectively, of all sampled MGL3 cells per region were  
242 represented in clones (**Fig. 2g**). Similarly, 52.5% to 55.1% of all mature oligodendrocytes  
243 (MOL1) were found in clones across all regions followed by neuroblasts in the striatum  
244 (OBNBL3, 46.7%) and neuroblasts in the hippocampus (DGNBL1, 46.3%). The lowest  
245 proportion of cells represented in clones were observed for ependymal cells (EPEN, 1.3% to  
246 4.9% of EPEN cells across all regions), TEGLU16 piriform pyramidal neurons (2.5%), and



247 TEINH21 inhibitory neurons (7.8%) in the cortex. In line with our previous observation and as  
248 expected, we found a high correlation ( $r = 0.57$ ) between the number of cells in clones and  
249 barcode expression level for each cell type (**Extended Data Fig. 14**). In conclusion, we  
250 captured clonal information about most cell types found across different regions of the mouse  
251 telencephalon and demonstrated that reconstruction of clonal relationships using TREX has a  
252 very low error rate.

253

### 254 **Regional distributions of clonally related cells**

255 Because we isolated barcoded cells from cortex, striatum and hippocampus, we asked how  
256 often clonally related cells spread across these areas. By calculating the proportions of cells  
257 across each forebrain region for each cloneID, we observed that the cells of 1,880 clones  
258 (79.7%) accumulated in a single region (**Fig. 3a, b**). This corresponds to 648 clones found  
259 solely in cortex (CX, 27.5%), 656 clones in striatum (STR, 27.8%) and 576 clones in  
260 hippocampus (HC, 24.4%). Clonal dispersion of progenitors across more than one region was  
261 less frequent and was observed for 282 clones (11.9%) spreading across CX and STR as well  
262 as CX and HC (182 clones, 7.7%), but rarely between STR and HC (9 clones, 0.4%) or all three  
263 regions (7 clones, 0.3%). This indicates that most clonally related cells show limited regional  
264 dispersion across the mouse telencephalon.

265 To assess which cell types were associated with dispersed clones, we determined the cell type  
266 composition of clones spread across multiple forebrain regions relative to the total number of  
267 cells in clones for each cell type (**Fig. 3c, d, Extended Data Fig. 15**). We found that clonally  
268 related cells that crossed the CX/STR boundary often contained inhibitory neurons such as  
269 MGE-derived neurogliaform cells (TEINH16) in the CX (**Fig. 3e**). Inhibitory neurons shared  
270 a cloneID with medium spiny neurons (MSN1) and grey matter astrocytes (ACTE2) in the STR  
271 as well as neuronal intermediate progenitor cells (SZNBL) and oligodendrocyte subtypes in  
272 both STR and HC. These data suggest that MGE-derived cortical interneurons are generated  
273 by distinct progenitor cells and revealed that individual progenitors can give rise to both  
274 neurons and oligodendrocytes. Also, subventricular zone neural stem cells (RGSZ) in the STR  
275 often shared a cloneID with cells such as grey matter astrocytes (ACTE2), layer 2/3 excitatory  
276 neurons (TEGLU7) and all oligodendrocyte subtypes in the CX (**Fig. 3f**). This demonstrates a  
277 direct clonal relationship between E9.5 progenitor cells that generate RGSZ neural stem cells  
278 and those that produce neurons and glia cells for the other regions of the telencephalon during  
279 embryonic development. A similar observation has been made using viral DNA barcoding at  
280 E11.5 (ref<sup>38</sup>) and our results corroborate the authors predictions about an earlier clonal  
281 relationship between adult and embryonic neural stem cells.

282 Many cell types that were specifically found in the HC such as neural stem cells in the  
283 subgranular zone, neuroblasts, excitatory and granule neurons shared a cloneID with multiple  
284 other cell types in HC, but rarely with other cell types in CX indicating an early segregation of  
285 progenitor fields for both regions (**Extended Data Fig. 16a-d**). However, clones with Cajal-  
286 Retzius cells (CR) were an exception: these clones rarely contained other cell types and often  
287 shared a cloneID with CR cells in CX (**Fig. 3g**). We quantified the proportions of CR cells  
288 across both regions for each cloneID and observed that the 24.6% of cloneIDs accumulated in  
289 CX, 49.3% in HC and 26.1% spread across both CX and HC (**Extended Data Fig. 16e, f**). CR  
290 cells are among the first-born neurons critical for brain development and our data confirm that  
291 these cells originate from three distinct sites in the brain<sup>39</sup> and further indicate that the  
292 progenitors from disparate embryonic fields converge in their differentiation to produce  
293 transcriptionally similar cells.

294 The anatomical boundary between HC and STR was very rarely crossed (**Fig. 3h**) and cell  
295 types associated with such clones were mostly glial cells of the oligodendrocyte lineage such  
296 as oligodendrocyte precursor cells (OPC) and committed oligodendrocyte precursors (COP1).  
297 This suggests that oligodendrocytes in both HC and STR are derived from a common  
298 progenitor most likely located in the ventral forebrain which generates OPCs that subsequently  
299 migrate widely into all parts of the telencephalon before differentiating<sup>40</sup>.

300 Finally, clonally related immune cells comprising microglia (MGL1, MGL3) and perivascular  
301 macrophages (PVM1) showed a widespread regional dispersion and crossed anatomical  
302 boundaries between CX, STR and HC 1.3-fold to 9-fold more often than neuroectoderm-  
303 derived clones (**Fig. 3i, j**). This suggests that myeloid progenitors and their progeny undergo  
304 extensive migration to populate large areas of the forebrain.

305

### 306 **Fate distributions of clonally related cells**

307 We investigated the distribution of cloneIDs across cell types by calculating the proportions of  
308 cells within each major cell class (astroependymal, immune, projection neurons, interneurons,  
309 immature neurons, oligodendrocytes) for each cloneID. We found that immune cells  
310 (n = 84 clones) consisting of microglia and perivascular macrophages constitute a separate  
311 lineage as expected (**Fig. 4a**). Out of the remaining 2,276 neuroectoderm-derived clones, a total  
312 of 1,193 clones (52.4%) contained at least two different cell types, e.g. 430 clones (18.9%)  
313 contained both astroependymal cells and oligodendrocytes while 40 clones (1.8%) contained  
314 projection neurons, immature neurons, astroependymal cells as well as oligodendrocytes  
315 (**Fig. 4b**). The remaining 1,083 neuroectoderm-derived clones contained only one of the five  
316 major cell types and such clones were also observed among the largest clones (**Extended Data**

317 **Fig. 17**). While this might suggest that lineage-restricted progenitor cells exist in the E9.5  
318 mouse neuroepithelium, it is not possible to conclude that a strictly “uni-potential” progenitor  
319 was indeed present during barcoding, because only a small sample of its progeny had been  
320 isolated.

321 To systematically assess lineage relationships among subclasses of all cell types, we  
322 investigated the probability of recovering shared cloneIDs from all pairs of profiled cells in the  
323 mouse brain. We calculated the clonal coupling score defined as the number of shared cloneIDs  
324 relative to randomized data<sup>23</sup> yielding values that range from positive (related cells) to negative  
325 (unrelated cells) for each brain (**Extended Data Fig. 18**). To summarize the data for all brains,  
326 we focused on the 27 cell types found in clones with at least 3 cells per clone across all four  
327 brains and determined the pairwise correlation between coupling scores. Hierarchical  
328 clustering of the pairwise correlations revealed four distinct groups of clonally related cells  
329 corresponding to diverse cell types of the cortex, hippocampus and striatum as well as  
330 microglia from all three regions (**Fig. 4c**). These results corroborated our previous observations  
331 regarding the limited clonal dispersion of most neuroectoderm-derived cell types across the  
332 mouse telencephalon.

333 We observed a strong clonal coupling in the hippocampus between neuronal and  
334 astroependymal cells (fate 1) as well as between astroependymal cells and oligodendrocytes  
335 (fate 2) indicating that these cells originate from two fate-biased pools of progenitor cells. We  
336 found that 265 clones containing 1,683 cells were biased towards fate 1 (**Fig. 4d**) and consisted  
337 mainly of neuronal cell types such as dentate gyrus neuroblasts (DGNBL1, 51.7%), neuronal  
338 intermediate progenitor cells (SZNBL, 11.4%) and granule neurons (DGGRC1, 1.6%) as well  
339 as astroependymal cells including grey matter (protoplasmic) astrocytes (ACTE2, 21%) and  
340 radial glia-like cells (RGDG, 10.4%). A total of 192 clones with 682 cells were biased towards  
341 fate 2 (**Fig. 4e**) and contained mainly oligodendrocyte subtypes such as oligodendrocyte  
342 precursor cells (OPC, 37.5%), committed oligodendrocyte precursors (COP1, 34.2%) as well  
343 as astroependymal cells including white matter (fibrous) astrocytes (ACTE1, 12.8%) and grey  
344 matter (protoplasmic) astrocytes (ACTE2, 5%). One population of progenitor cells, fate 1,  
345 likely corresponds to the embryonic precursors of adult neural stem cells<sup>41</sup> that are biased to  
346 generate astroependymal cells and dentate granule neurons as early as E9.5. The second  
347 precursor cell population, fate 2, mainly contains oligodendrocyte subtypes and could represent  
348 a major source of hippocampal glia cells involved in myelin formation and maintenance.

349 We also investigated the cloneID distribution across cell types that were not included in the  
350 clonal coupling analysis, because they were not isolated from all four brains and/or they were  
351 not contained in clones with at least 3 cells per clone. Interestingly, we never observed

352 hippocampal CA1 (TEGLU24) and CA3 (TEGLU23) excitatory neurons in the same clone that  
353 otherwise contained identical cell types (**Fig. 4f, g**). Because the number of clones containing  
354 at least one CA1 or CA3 neuron was small (42 clones with 77 CA1 cells and 11 clones with  
355 14 CA3 cells), we cannot exclude that these cells share a common progenitor. However, our  
356 observations are in agreement with previous studies about the early specification of CA field  
357 identity<sup>42</sup> and might indicate a fate specification (or at least fate bias) as early as E9.5.  
358 We investigated the clonal relationships between microglia in the brain parenchyma (MGL1,  
359 MGL3) and perivascular macrophages (PVM1) located at CNS borders. We found that 10 out  
360 of 14 clones (n = 587 cells) that contained PVM1 cells also contained one or both microglia  
361 subtypes (**Fig. 4h, i**). Compared to 331 MGL1 cells (56.4%) and 220 MGL3 cells (37.5%),  
362 these clones contained only 36 PVM1 cells (6.1%). Because barcode expression levels and  
363 proportion of cells in clones were similar for MGL1, MGL3 and PVM1 (**Fig. 2g, Extended**  
364 **data Fig. 14**), this observation indicates that the common progenitor for all three cell types  
365 largely generates microglia and few perivascular macrophages. While it has been established  
366 that microglia are derived from mesodermal progenitors<sup>43,44</sup>, it has been shown only recently  
367 that the same early embryonic precursors also generate perivascular macrophages<sup>45,46</sup>. Our  
368 results are in line with this observation and further revealed that microglia are generated in  
369 much larger numbers than perivascular macrophages from a common progenitor cell.

370

### 371 **Spatial profiling of transcriptomes, cell types and clones**

372 Next, we developed Space-TREX, a method based on spatial transcriptomics (ST)<sup>26</sup> that  
373 enables simultaneous clonal tracing and expression profiling of barcoded mouse brain sections  
374 *in situ* (**Fig. 5a**). We introduced immunostaining of intracellular antigens into the protocol  
375 enabling combined profiling of spatial gene and protein expression together with clonal  
376 barcodes in the same tissue section (**Fig. 5b; Extended Data Fig. 19a-d**). Because ST relies  
377 on the capture of transcripts in spots with a diameter of 55  $\mu\text{m}$ , most spots contain between 1-  
378 10 cells with an average of about 4 cells (**Extended Data Fig. 19e**). However, not every cell  
379 in the tissue is barcoded and out of all spots containing an EGFP+ cell, 81% of spots contain  
380 only one barcoded cell and the rest more than one barcoded cell (**Extended Data Fig. 19f**).  
381 Therefore, it can be assumed that a cloneID captured in a spot originates most often from a  
382 single barcoded cell and we can reveal its identity using protein expression data collected for  
383 the same section.

384 We hybridized 8 adjacent coronal sections from one P14 brain hemisphere barcoded at E9.5  
385 covering the region about 1.65 mm posterior from Bregma and used antibodies targeted to  
386 EGFP, NeuN and Olig2 to identify barcoded cells, neurons and oligodendrocytes, respectively

387 (Fig. 5c). To establish an integrated dataset containing information on spatial gene expression  
388 patterns, cell types, clones, and neuroanatomical definitions, we aligned brain sections to the  
389 Allen mouse brain reference atlas using an integrated computational framework<sup>47,48</sup> (Extended  
390 Data Fig. 19g-i). The entire dataset after quality control contained information on the  
391 transcriptional profiles of 28,746 features that were distributed across all forebrain regions. We  
392 extracted a total of 1,321 cloneIDs of which 1,079 cloneIDs were contained in 162 clones  
393 (defined as groups of two or more spots containing the same cloneID) distributed across all  
394 sampled brain regions (Fig. 5d, e; Extended Data Fig. 19j-n). The number of cells per clone  
395 in the Space-TREX data ( $6.7 \pm 0.4$ , mean  $\pm$  SEM,  $n = 162$  clones, Fig. 5f) was significantly  
396 larger than the clone size observed in the TREX data ( $4.9 \pm 0.3$ , mean  $\pm$  SEM,  $n = 2360$  clones)  
397 indicating that cell loss leading to incomplete clones is reduced when using a spatial barcode  
398 readout (see also discussion).

399 Using the Space-TREX dataset, we investigated the regional dispersion of clonally related cells  
400 across the mouse telencephalon (Fig. 5g). In line with the TREX data, most clones showed a  
401 limited spread across all regions except for clones with cells located in white matter fiber tracts  
402 that are known to be enriched for oligodendrocytes derived from highly migratory  
403 progenitors<sup>40</sup>. While most clonally related cells crossed boundaries of major anatomical regions  
404 at low frequencies, intra-regional dispersion was more common as observed for clones that  
405 mainly spread among cortical regions such as the amygdalar (AMY) and olfactory (OLF) areas  
406 as well as upper (UL) and deeper (DL) cortical layers (Fig. 5h). Interestingly, we observed  
407 extensive dispersion between either AMY/OLF or DL/UL suggesting that most early  
408 progenitor cells are restricted to generate cell types of either area but undergo more widespread  
409 migration within each area.

410 Next, we utilized cell type information available for barcoded cells and found that clones  
411 containing both neurons and oligodendrocytes show an extensive spread across multiple  
412 regions including cortical regions, striatum, pallidum, thalamus, hypothalamus and fiber tracts  
413 (Fig. 5i, j; Extended Data Fig. 20a, b). This mode of dispersion likely corresponds to  
414 tangential migration well described for interneurons<sup>49</sup> that also share a common early  
415 progenitor with oligodendrocytes although these lineage relationships are not well  
416 understood<sup>50</sup>. We also observed neuronal clones that formed radially organized clusters mainly  
417 in the AMY/OLF areas as well as UL/DL areas of the cortex (Fig. 5k-m; Extended Data Fig.  
418 20c-e). While a few members of these clones were more widespread, more than 80% of all  
419 clonally related cells were found in larger clusters spanning areas of around 1.75 mm x  
420 1.75 mm. Interestingly, cells from dispersed clones were distributed across the dorsoventral  
421 axis within a single 10  $\mu$ m section while cells from clustered clones were spread from the most

422 anterior to the most posterior brain section spanning 80  $\mu\text{m}$  (**Extended Data Fig. 20f-i**),  
423 Together, these data demonstrate that Space-TREX can be utilized for high-throughput  
424 mapping of clonal relationships and cell types *in situ* and we expect such an integrated approach  
425 to be highly relevant to relate gene expression, clonality as well as connectivity.

426

## 427 **Discussion**

428 We have developed two complementary approaches that enable simultaneous clonal tracing  
429 and gene expression profiling of dissociated mouse brain cells using single-cell RNA-seq  
430 (TREX) and of entire mouse brain sections using spatial transcriptomics (Space-TREX). Using  
431 TREX, we unravelled that the regional dispersion of most clonally related cells is limited and  
432 that most dispersion occurs across the anatomical boundaries of cortex (CX) and striatum  
433 (STR) or cortex (CX) and hippocampus (HC), respectively. Often specific cell types are  
434 associated with dispersed clones such as interneuron subtypes (CX/STR), Cajal-Retzius cells  
435 (CX/HC) or oligodendrocyte subclasses (STR/HC). We discovered two fate-biased progenitor  
436 cell populations that exist as early as E9.5 in the hippocampal neuroepithelium and that tend to  
437 generate clones containing neuronal/astroependymal (fate 1) or  
438 astroependymal/oligodendrocyte (fate 2) cells, respectively. This finding suggests an  
439 unexpected early segregation of precursor cells and is consistent with fate 1 progenitors being  
440 the origin for Hopx<sup>+</sup> precursors that continue to become adult neural stem cells in the mouse  
441 dentate gyrus<sup>41</sup>.

442 We unravelled unique features of myeloid-derived clones (microglia and perivascular  
443 macrophages) such as their large clone sizes and widespread dispersion across multiple  
444 forebrain regions compared to neuroectoderm-derived clones. The large clone size probably  
445 reflects the massive proliferation of brain macrophages required to colonize the entire CNS,  
446 because only a small number of precursors enters the brain before closure of the blood-brain  
447 barrier around E13 restricting access to immune cells that arise later in development<sup>36</sup>. It has  
448 been described that embryonic microglia migrate long distances within regions after entering  
449 the brain<sup>51</sup> and we show that clonally related microglia also extensively migrate across  
450 anatomical boundaries to populate large areas of the brain. Both processes, microglia expansion  
451 and dispersion are central for brain homeostasis<sup>52-54</sup>, but remain only partially understood in  
452 particular at the clonal level. Thus, novel tools such as TREX enable systematic studies of the  
453 underlying molecular mechanisms within context of microglia clonality.

454 Using Space-TREX, we provide the first demonstration of high-density clonal tracking coupled  
455 to cell phenotyping and *in situ* sequencing of brain tissue and showed that patterns of clonal  
456 dispersion, tangential and radial migration, can be reconstructed using spatial transcriptomics.

457 Compared to previous approaches that utilize complex *in situ* hybridization schemes and  
458 fluorescence microscopy for barcode detection<sup>14,17</sup>, Space-TREX relies on widely available  
459 reagents and DNA sequencing thus enabling barcode readout in large tissue sections at scale<sup>55</sup>.  
460 Currently, (Space-)TREX is limited by undersampling due to loss of barcoded cells following  
461 isolation via FACS (35-64% of sorted cells recovered) and droplet encapsulation (50% of  
462 loaded cells recovered) as well as cloneID dropout from a subset of sequenced cells (24-51%  
463 contain a cloneID), resulting in clonal information for 2-7.5% of all initially isolated cells from  
464 a barcoded brain (**Extended Data Fig. 21**). Therefore, we expect that the true clone size is 13-  
465 to 50-fold higher than the average clone size observed under our experimental conditions and  
466 estimate that each neuroectoderm-derived clone contains between 52-200 cells while each  
467 myeloid-derived clone is composed of 390-1500 cells. While we, to our knowledge, report the  
468 first estimated clone sizes for myeloid-derived cells in the mouse brain, our clone size estimates  
469 for neuroectoderm-derived clones are in agreement with the recent finding that a cortical clone  
470 labelled at E9.5 contains  $199 \pm 29$  cells (mean  $\pm$  SEM, n = 13 clones)<sup>56</sup>.

471 The observed cell and barcode recovery rates are in line with other approaches employing a  
472 scRNA-seq readout of genetic barcodes in various model systems and highlight a general  
473 challenge for such methods (**Extended Data Fig. 22**). Thus, such approaches probably  
474 underestimate the true number of multipotent clones, but instead rely on sequencing thousands  
475 of cells to provide statistically robust insights about the fate bias of progenitor cells. One  
476 practical solution to reduce both cell and cloneID loss is using a plate-based assay with higher  
477 RNA detection sensitivity such as Smart-Seq3 (ref<sup>57</sup>). Further, undersampling could be  
478 completely eliminated by the adoption of a single-cell, high sensitivity *in situ* readout of cell  
479 types and barcodes using array-based spatial transcriptomics. Our Space-TREX data provide a  
480 first example of this: although the method currently lacks single-cell resolution and does not  
481 capture all cloneIDs, we found a significantly higher number of cells in clones compared to  
482 TREX.

483 Our *in vivo* barcoding approach is robust and can be applied to any tissue and cell type  
484 amenable to virus transduction without relying on a dedicated transgenic mouse line.  
485 Compared to classical fate mapping studies that rely on sparse labelling of cells in dozens to  
486 hundreds of animals, (Space-)TREX enables high throughput dense reconstruction of clonal  
487 relationships using only a few animals. In particular, our approach involves 13-31 times less  
488 animals than needed for typical fate mapping studies while recovering 3-13 times more clones  
489 in total and 98-182 times more clones on average per animal (**Extended Data Fig. 23**). In  
490 contrast to CRISPR-based lineage tracing systems<sup>15,20,21,24,25</sup>, our technology uses millions of  
491 diverse and compact barcodes that can be easily cloned as libraries enabling straightforward

492 barcode readout and clone reconstruction. We used a constitutively expressed barcode, but also  
493 provide a Cre-inducible lentivirus for conditional barcode expression as well as a backbone  
494 containing an U6-gRNA expression cassette to couple clonal tracking with CRISPR-based  
495 perturbations (**Extended Data Fig. 24**). Other future modifications could include the insertion  
496 of cell type specific regulatory elements<sup>58</sup>, activity indicators<sup>59</sup>, optogenetic<sup>60</sup> or  
497 chemogenetic<sup>61</sup> probes for functional interrogation of clonally related cells<sup>62,63</sup>. Overall, we  
498 believe that an integrated approach such as Space-TREX is required to disentangle the complex  
499 relationships between cell identity, cell history and tissue anatomy required to understand both  
500 the healthy and diseased brain.



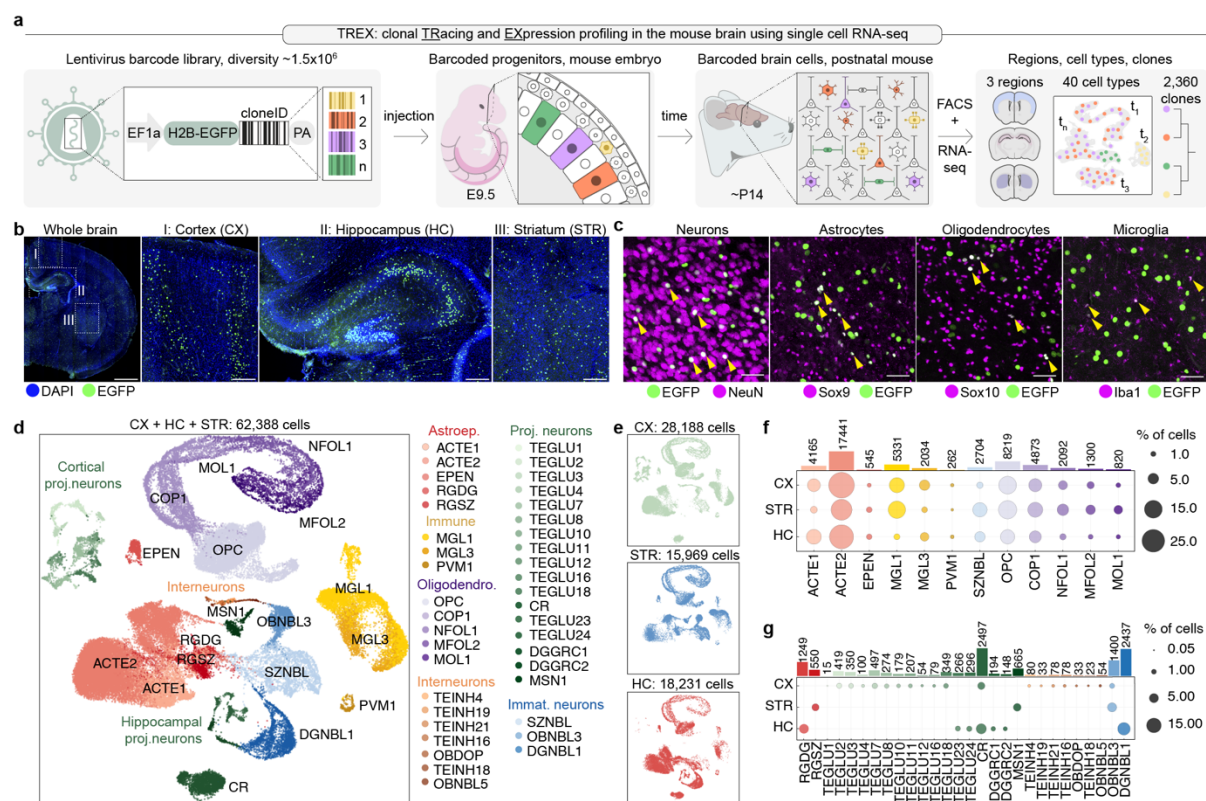

501  
 502 **Fig. 1 | TREX enables simultaneous profiling of cell phenotype and clonality.** **a**, Workflow for *in*  
 503 *vivo* barcoding and profiling of brain cells. Microinjection of a highly diverse lentiviral barcode library  
 504 into the ventricle of the developing mouse brain results in the expression of the barcode and EGFP in  
 505 progenitor cells and their progeny. Each barcode serves as a unique cloneID that is inherited as  
 506 progenitors differentiate into diverse brain cell types and single-cell RNA-seq is used to reveal the  
 507 transcriptome and cloneID. We injected virus at embryonic day (E) 9.5 and isolated barcoded cells from  
 508 three forebrain regions at postnatal day (P) 14 for RNA-seq which revealed 40 cell types and a total of  
 509 2,360 clones. **b**, Barcoding at E9.5 results in widespread and stable transgene expression in  
 510 telencephalic regions including cortex (CX), hippocampus (HC) and striatum (STR) of the postnatal  
 511 brain. Scale bars: whole brain, 1 mm; crop outs, 100  $\mu$ m. **c**, Barcoding at E 9.5 results in stable transgene  
 512 expression in all major cell types of the postnatal mouse brain. Scale bar: 50  $\mu$ m. **d**, Visualization of  
 513 identified cell classes using uniform manifold approximation and projection (UMAP). In total, 62,388  
 514 single cell transcriptomes were collected from three telencephalon regions and five brains (barcoded  
 515 and non-injected controls) that were classified into 40 cell types. Capital black letters indicate a unique  
 516 identifier for each cell type taken from [www.mousebrain.org](http://www.mousebrain.org). Colours indicate six broader cell type  
 517 classes: astroependymal (reds), immune (yellows), interneurons (oranges), projection neurons (greens),  
 518 immature neurons (blues) and oligodendrocytes (purples). **e**, The same UMAP as in panel d split by  
 519 regional origin of cells: cortex (n = 28,188 cells, top), striatum (n = 15,969 cells, middle) and  
 520 hippocampus (n = 18,231 cells, bottom). **f**, **g**, Dot plots showing fractions of cells in each class per  
 521 region for cell types found in all three regions (**f**) and for cell types unique to one or two regions (**g**).  
 522 Bar plots show total numbers of cells for each cell type.

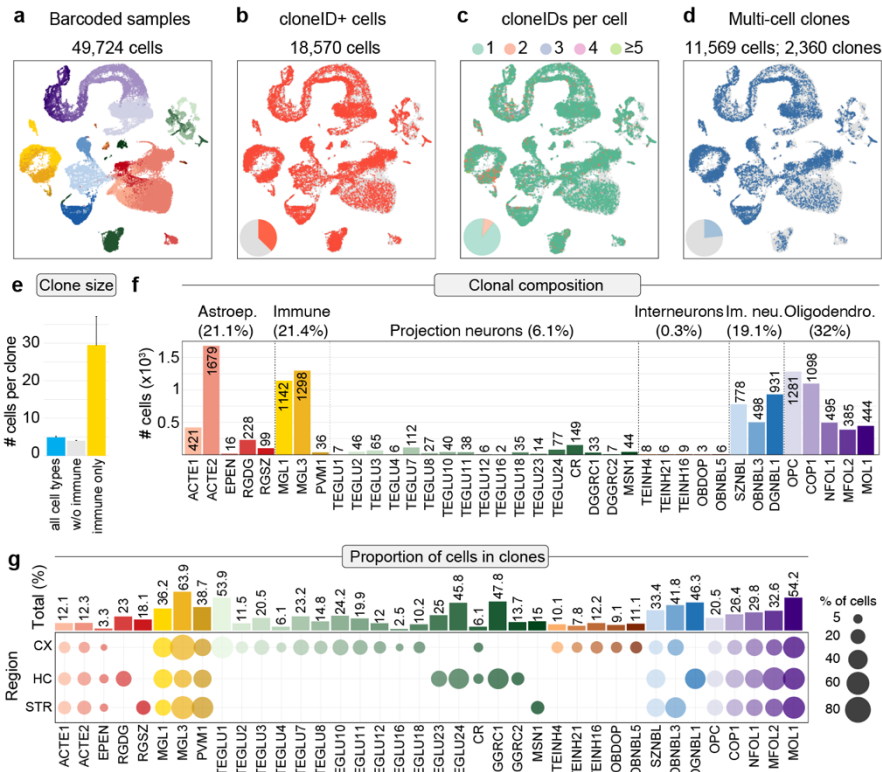

523  
524 **Fig. 2 | Clone reconstruction across cell types and regions in the mouse telencephalon.**

525 **a-d**, UMAP visualizations of all cells isolated from barcoded samples grouped by cell type (a), cloneID-  
526 expressing cells (b), number of cloneIDs per cell (c) and cells in multi-cell clones (d). **e**, Bar plots  
527 showing average clone sizes (number of cells per clone). The average clone size varies depending on  
528 cell type and is  $4.9 \pm 0.3$  cells/clone when considering all cell types (left bar;  $n = 2,360$  clones),  $4 \pm 0.1$   
529 cells/clone when considering only neuroectoderm-derived cells (middle bar,  $n = 2,276$  clones) and  $29.5$   
530  $\pm 7.6$  cells/clone when considering only mesoderm-derived immune cells (right bar,  $n = 84$  clones).  
531 Values correspond to mean  $\pm$  SEM. **f**, Bar plots showing total number of cells in clones for each cell  
532 type. **g**, Dot plots and bar plots displaying the total proportion of cells in clones for each cell type (top)  
533 and per region (bottom).

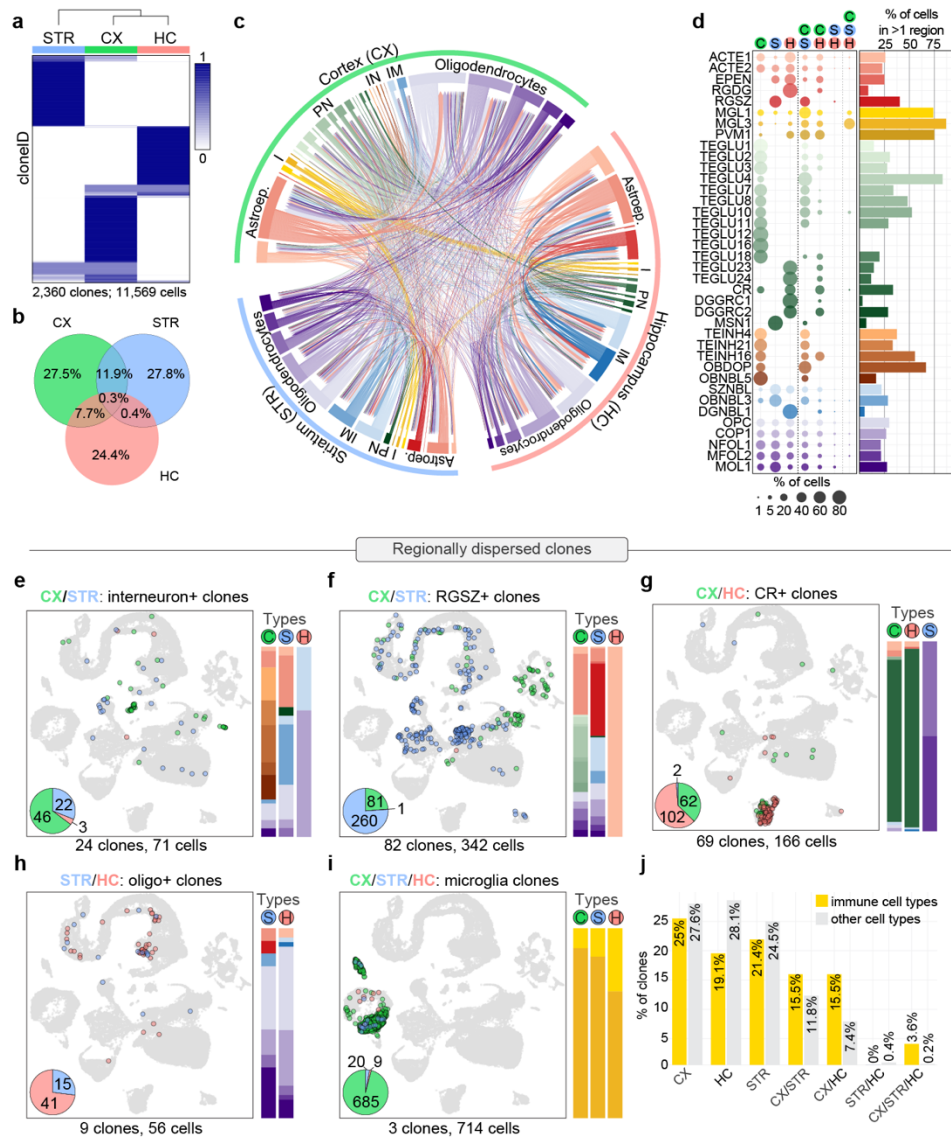

534

535 **Fig. 3 | Regional distribution of clonally related cells across the telencephalon.**

536 **a, b**, Most cells belonging to the same clone were restricted to a single brain region. For each cloneID  
537 (rows), the proportions of cells within each region (columns) were calculated, scaled by row and  
538 coloured as shown in the figure (a). The fraction of cells per clone belonging to one region (CX, STR  
539 or HC), two regions (CX/STR, CX/HC or STR/HC) or all three forebrain regions (CX/STR/HC) was  
540 determined and displayed as Venn diagram (b). All 2,360 clones and a total of 11,569 cells were  
541 considered. CX, cortex (green); STR, striatum (blue); HC, hippocampus (red). **c**, Circos plot displaying  
542 shared cloneIDs between all cell classes (inner segments) across CX, STR and HC (outer segments).  
543 For each cell pair, the number of shared cloneIDs is indicated by the width of the link and the colour of  
544 each link represents cell type. **d**, Cell types associated with dispersed clones were identified by  
545 determining the cell type composition of clones spread across multiple telencephalon regions relative  
546 to the total number of cells in clones for each cell type. The bar plot summarizes the proportion of cells  
547 in clones spread across multiple regions. **e-i**, Examples of cell types in clones dispersed across multiple  
548 regions. Each example contains a UMAP visualization of cells, a pie chart displaying the number of

549 cells per region and bar plots to illustrate the cell type composition of clones. Selected clones dispersed  
550 across the anatomical boundaries between cortex and striatum (e, f), cortex and hippocampus (g),  
551 striatum and hippocampus (h) and all three regions (i) are displayed. **j**, Clonally related immune cells  
552 (MGL1, MGL3, PVM1) disperse more frequently across telencephalon regions compared to  
553 neuroectoderm-derived cells. The fraction of clones containing clonally related cells found in one  
554 region (CTX, STR, HC), two regions (CX/STR, CX/HC, STR/HC) or three regions (CX/STR/HC) is  
555 shown.

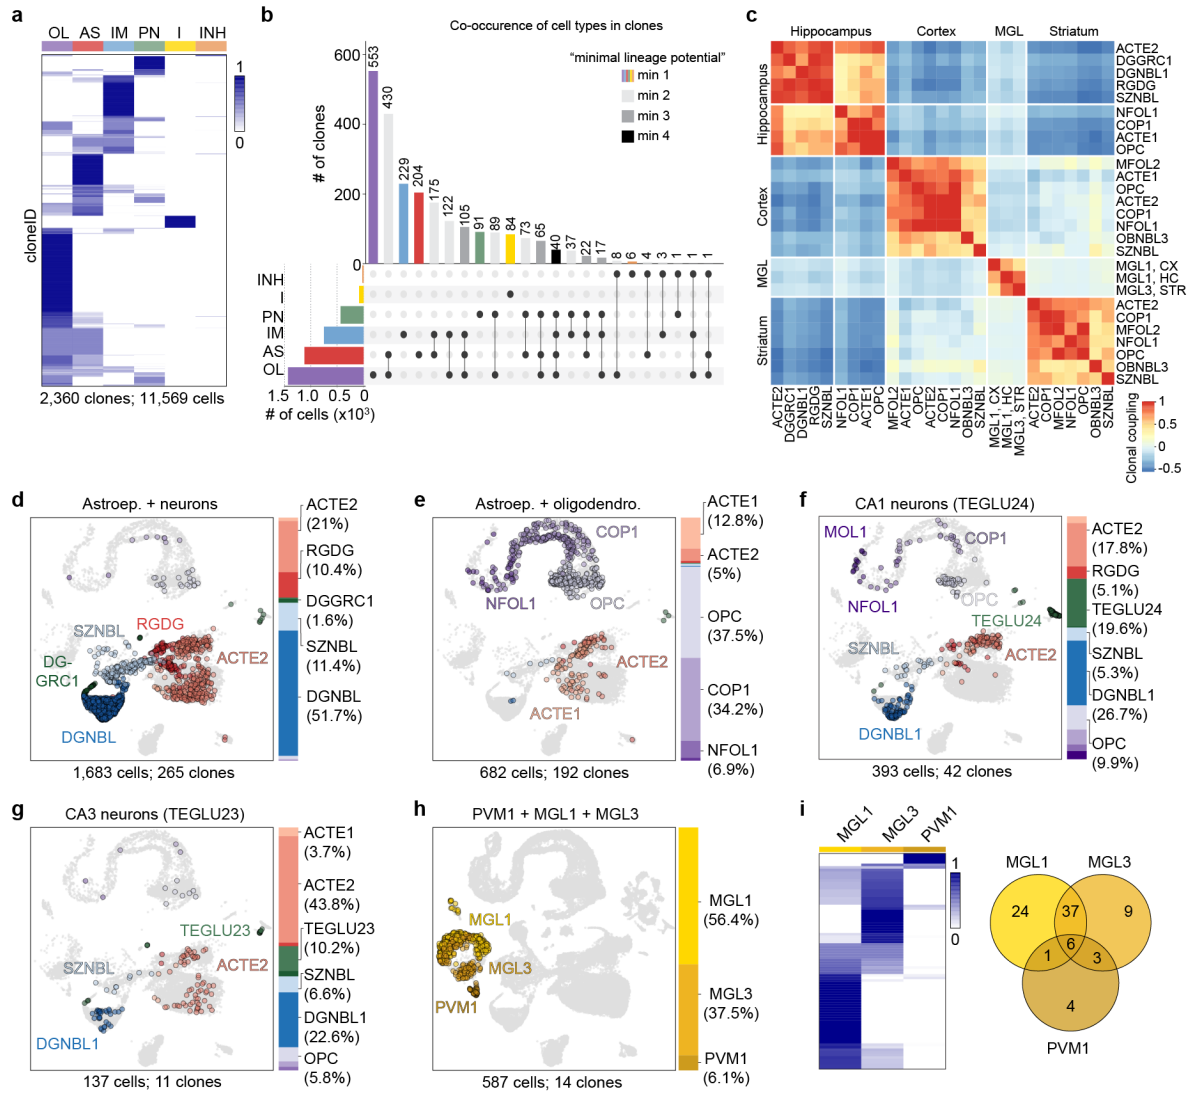

556

557

**Fig. 4 | TREX reveals fate-biased progenitors of neuroectodermal and myeloid origin.**

558

**a**, Heatmap showing the proportions of each major cell type (columns) per cloneID (rows). For each

559

cloneID, the proportions of cells within each cell type were calculated, scaled by row and coloured as

560

shown in the figure. All 2,360 clones and a total of 11,569 cells were considered. OL, oligodendrocytes;

561

AS, astroependymal cells; IM, immature neurons; PN, projection neurons; I, immune cells; INH,

562

inhibitory interneurons. **b**, "UpSet" plot showing the co-occurrence of cell types in the same clone. All

563

clones as shown in panel a were plotted. The bar plot shows the number of clones containing a particular

564

combination of cell types and each bar is a different combination. The graphical table underneath the

565

bar plot displays what those cell type combinations are. Each row is one cell type labelled as in panel

566

a. For example, the most common subset of clones contains only OL cells (n = 553 clones, purple bar)

567

followed by OL and AS cells (n = 430 clones, second light grey bar). The black dots and lines show the

568

combination of cell types that make up each cluster or subset of clones. The smaller bar plot to the left

569

of the graphical table shows the unconditional frequency count of each cell type across all subsets. We

570

cannot exclude that a clone is indeed multipotential (= containing cells of more than one type) and the

571

true number of multipotential clones is likely underestimated, because only a small sample of its

572 progeny has been isolated. Therefore, we label clones as “minimally uni-potential” (colored bars),  
573 “minimally bi-potential” (light grey bars), “minimally tri-potential” (medium grey bars), “minimally  
574 tetra-potential” (dark grey bars). **c**, Heatmap showing correlation between clonal coupling scores  
575 defined as the number of shared cloneIDs relative to randomized data for each pair of cell types (see  
576 methods for details). High correlation values indicate a clonal relationship between cell types and a  
577 common progenitor cell. Clustered using complete linkage method. **d**, **e**, Precursor cells in the  
578 hippocampus neuroepithelium are biased to generate one of two fates. UMAP visualizations and bar  
579 plots for clones containing astroependymal (ACTE2, RGDG) and neuronal cells (DGNBL, SZNBL,  
580 DGGRC1) associated with fate 1 (d) as well as clones containing astroependymal cells (ACTE1,  
581 ACTE2) and oligodendrocyte subtypes (OPC, COP1, NFOL1) associated with fate 2 (e). **f**, **g**, Early fate  
582 specification of CA1 and CA3 excitatory neurons. Clones containing CA1 (TEGLU24) neurons never  
583 contained CA3 (TEGLU23) neurons (f) and vice versa (g). Otherwise these clones contained the same  
584 cell types including ACTE1, ACTE2, DGNBL1, SZNBL, OPC and COP1. **h**, **i**, Macrophages of the  
585 CNS parenchyma and CNS borders share the same precursor cell. UMAP visualization and bar plot for  
586 all 14 clones that contained perivascular macrophages (PVM1, h). Heatmap showing the proportion of  
587 cells classified as MGL1, MGL3 or PVM1 for each cloneID and Venn diagram displaying the number  
588 of clones containing cells of one, two or all three types (i) considering all 84 clones with 2,476 immune  
589 cells.

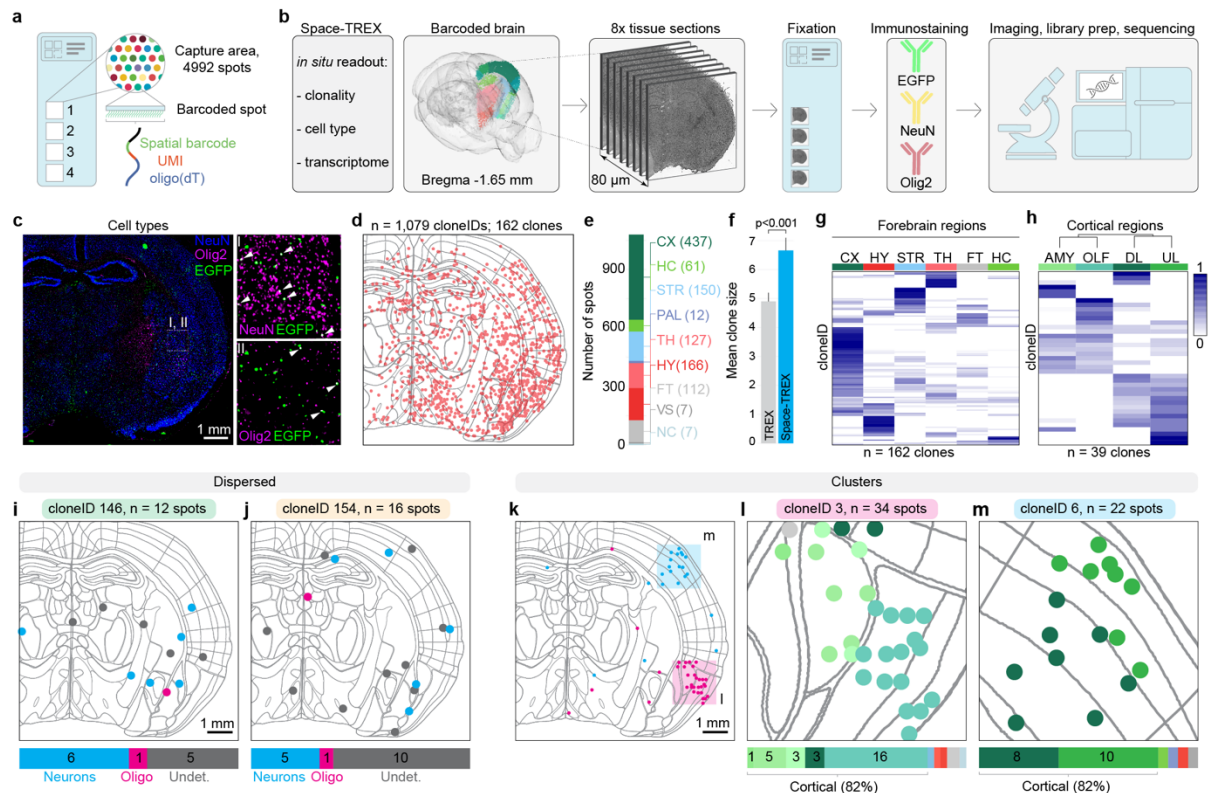

590

591 **Fig. 5 | Space-TREX enables simultaneous profiling of transcriptomes and clones *in situ*.**

592 **a**, Glass slide layout used for spatial transcriptomics. Each slide consists of four 6.5 mm x 6.5 mm  
593 capture areas each containing 4,992 barcoded spots with a diameter of 55 μm and a center-to-center  
594 distance of 100 μm. Each spot contains spatially-barcoded capture oligonucleotides that bind mRNA  
595 released from the tissue enabling gene expression profiling *in situ*. **b**, Overview of the Space-TREX  
596 workflow. Adjacent 10 μm sections from a lentivirus-injected, barcoded brain were collected, fixed and  
597 incubated with fluorophore-conjugated antibodies recognizing EGFP (barcoded cells), NeuN (neurons)  
598 and Olig2 (oligodendrocytes) followed by imaging, library preparation and sequencing. **c**, Overview  
599 image of one immunostained brain section (left) and a zoom in showing barcoded neurons (I, white  
600 arrowheads) and barcoded oligodendrocytes (II, white arrowheads). **d**, A total of 1,321 cloneIDs were  
601 extracted from all analysed sections of which 1,079 cloneIDs were contained in 162 clones (defined as  
602 groups of two or more spots with the same cloneID). These cloneIDs are displayed as red dots projected  
603 onto a digital brain section containing anatomical reference outlines. **e**, Number of cloneID positive  
604 spots per major brain region. **f**, Clones reconstructed using Space-TREX (n = 162 clones) contain a  
605 significantly higher number of cells compared to TREX (n = 2,360 clones) which relies on tissue  
606 dissociation for scRNA-seq (Welch two sample t-test,  $t = 3.3205$ ,  $df = 344.2$ ,  $p\text{-value} = 0.0009948$ , 95%  
607 CI is 0.7 to 2.8). Values for clone sizes correspond to mean ± SEM. **g**, Regional distribution of all  
608 clonally related cells across forebrain region reveals patterns of clonal dispersion. Only regions  
609 containing more than 20 cloneIDs were considered resulting in the analysis of 162 clones with 1,053  
610 spots. For each cloneID, the proportions of cells within each region were calculated, scaled by row and  
611 coloured as shown in the legend. CTX, cortex; HY, hypothalamus; STR, striatum; TH, thalamus; FT,

612 fiber tracts; HC, hippocampus. **h**, High resolution spatial mapping of clonal dispersion across cortical  
613 regions reveals progenitors with a bias to generate cells of either amygdala (AMY) and olfactory areas  
614 (OLF) or upper layer (UL) and deep layer (DL) cells. Note that some cloneIDs were only found in UL  
615 or DL, respectively, suggesting fate bias of early progenitors. Clones containing at least 50% of clonally  
616 related cells in the displayed four regions were considered resulting in the analysis of 39 clones with  
617 231 spots. **i, j**, Tangential migration of progenitors leads to widespread dispersion of neurons and  
618 oligodendrocytes. Two clones are shown as examples and clonally related spots are colour-coded by  
619 cell type (blue, neuron; magenta; oligodendrocyte; grey, undetermined). Note that regional information  
620 was left out for clarity and can be found the Extended Data Fig. 20a, b. **k-m** Radial migration of  
621 progenitors leads to clusters of clonally related cells illustrated with two clones (**k**) that mostly consist  
622 of cortical cells in the olfactory areas (**l**) and the primary somatosensory area (**m**). Clonally related spots  
623 are colour-coded by region with cortical regions in different shades of green. Note that cell type  
624 information as well as detailed regional annotation was left out for clarity and can be found in Extended  
625 Data Fig. 20c-e.



## 626 **Methods**

### 627 **Plasmid cloning**

628 LV-EF1a-H2B-EGFP (**Extended data Fig. 1a**) was based on LV-GFP<sup>64</sup>. To exchange the  
629 PGK1 promoter in LV-GFP with an EF1a promoter, the LV-H2B-EGFP backbone was  
630 amplified from LV-GFP using primer pair MRX1514/1515 (**Supplementary Table 1**) (IDT)  
631 and EF1a was amplified from plasmid dCas9-VP64\_GFP<sup>65</sup> using primer pair MRX1516/1517  
632 (**Supplementary Table 1**). Both fragments were digested with Sall-HF and SpeI-HF (NEB)  
633 followed by T4 ligation (NEB) and transformation of NEB Stable cells (NEB). Plasmids  
634 were prepared from the transformants and verified via Sanger sequencing.

635 Additional reporter constructs (**Extended data Fig. 7j**) were cloned by exchanging EGFP from  
636 LV-EF1a-H2B-EGFP with TagBFP (Evrogen), TagRFP (Evrogen) or emiRFP670 (ref<sup>66</sup>).  
637 Fluorescent proteins were amplified from plasmids using the primer pairs listed in  
638 **Supplementary Table 1** (IDT), digested with BamHI/NsiI (NEB) followed by T4 ligation  
639 with digested backbone and transformation of NEB Stable cells. Plasmids were prepared from  
640 the transformants and verified via Sanger sequencing.

641

### 642 **Plasmid library construction and virus production**

643 The backbone EF1-H2B-EGFP was digested with NsiI-HF and KpnI-HF (NEB) followed by  
644 heat inactivation, dephosphorylation using rSAP (NEB) and gel purification. An  
645 oligonucleotide library was prepared via low-cycle PCR using primer pair MRX1642/1643  
646 (**Supplementary Table 1**) (IDT) on an ultramer MRX1680 (**Supplementary Table 1**)  
647 containing a random 30N sequence (cloneID) flanked by homology arms. The purified PCR  
648 product was inserted into digested backbone using Gibson assembly<sup>67</sup> followed by ethanol  
649 precipitation and transformation of electrocompetent Endura cells (Lucigen). Bacteria were  
650 plated on a large 24.5 x 24.5 cm<sup>2</sup> plate containing solid media and ampicillin and cells were  
651 scraped from the plate for plasmid DNA extraction using a plasmid midi kit (Qiagen) the next  
652 day. Lentiviral transfer plasmid libraries were used for virus particle production and titration  
653 by the core facility VirusTech at Karolinska Institutet using the packaging plasmids pMD2.G  
654 and psPAX2 (a gift from Didier Trono, Addgene plasmids # 12259 and # 12260) or sent to  
655 GEG-Tech (Paris, France). Viruses with titers of >10<sup>9</sup> TU/ml were used for all applications.

656

### 657 **Next generation sequencing of lentivirus preparations**

658 Viral RNA was isolated from 4 µl of a typical lentivirus preparation (~2x10<sup>6</sup> TU/µl) using the  
659 NucleoSpin RNA Virus mini kit (Macherey-Nagel). Purified RNA was used as a template for  
660 reverse transcription using the SuperScript VILO cDNA Synthesis Kit (Invitrogen) in a total

661 volume of 80  $\mu$ l following the manufacturer's instructions (25°C for 10 min, 42°C for 60 min,  
662 85°C for 5 min). The cDNA was equally divided into four separate PCRs for cloneID  
663 amplification and indexing using the primers in **Supplementary Table 1** and the PCR protocol  
664 in **Supplementary Table 2**.

665 The resulting libraries were sequenced on an Illumina NextSeq (**Supplementary Table 3**),  
666 aligned against a reference containing the 30 bp cloneID and flanking regions using the BWA-  
667 MEM algorithm<sup>68</sup>. A custom BASH script was used to extract unique cloneIDs and  
668 corresponding read counts.

669

### 670 **Estimating the fraction of uniquely labelled cells**

671 First, we calculated the total number of cells at the timepoint of injection. If  $N_{t_1}$  is the number  
672 of labelled cells at E11.5,  $\Delta t$  is the time difference in days and  $f$  is the frequency of cell  
673 divisions per day, then the number of transduced cells  $N_{t_0}$  is:

674

$$675 \quad N_{t_1} = N_{t_0} * 2^{\Delta t f} \quad \text{hence} \quad N_{t_0} = \frac{N_{t_1}}{2^{\Delta t f}}$$

676

677 We determined  $N_{t_1} = 41,450$  cells,  $\Delta t = 2$  days and  $f = 2$  divisions/day (ref<sup>30</sup>) thus  $N_{t_0} =$   
678  $2,591 \pm 220$  cells, or approximately 2,600 as noted in the main text.

679 Second, we estimated the fraction of uniquely labelled cells. For a number of uniformly  
680 distributed barcodes ( $N$ ) and a small number of used barcodes ( $k$ ) to label progenitor cells, the  
681 fraction  $F$  of uniquely labelled cells can be approximated as:

682

$$683 \quad F = \left(1 - \frac{1}{N}\right)^{k-1}$$

684

685 However, the observed distribution of barcode abundance is not perfectly uniform in our  
686 library, which means that cells are more likely to be labelled with some barcodes than with  
687 others. As discussed extensively in previous studies<sup>55,69</sup>, the expected number of non-uniquely  
688 labelled cells,  $E(X)$ , is then given by:

689

$$690 \quad E(X) = k * \sum_{i=1}^N p_i (1 - (1 - p_i)^{k-1})$$

691

692 where  $p_i$  is the probability of picking the cloneID  $i = 1 \dots N$ ,  $k$  is the number of infected  
693 progenitor cells and  $N$  is the total number of injected cloneIDs. We typically injected  $N =$   
694  $0.94 \times 10^6$  cloneIDs and estimated  $k = 2,591$  cells, implying  $E(X) \approx 11$  non-uniquely labelled  
695 cells. This corresponds to 0.41% of non-uniquely labelled cells or about 99.6% uniquely  
696 labelled cells as stated in the main text.

697

## 698 **Mice**

699 CD-1 mice obtained from Charles River Germany were used for all experiments. Animals were  
700 housed in standard housing conditions with 12:12-hour light:dark cycles with food and water  
701 ad libitum. All experimental procedures were approved by the Stockholms Norra  
702 Djurförsöksetiska Nämnd.

703

## 704 **Ultrasound-guided *in utero* microinjection**

705 To target the developing mouse nervous system, a modified version of a previously published  
706 procedure<sup>64</sup> was used. Briefly, timed pregnancies were set up overnight, plug positive females  
707 were identified the next morning and counted as embryonic (E) age 0.5. Ultrasound check was  
708 performed at E8.5 to verify the pregnancy. Pregnant females at E9.5 of gestation were  
709 anaesthetized with isoflurane, uterine horns were exposed, each embryonic forebrain injected  
710 with 0.6  $\mu$ l of lentivirus and 4-8 embryos injected per litter. Surgical procedures were limited  
711 to 30 min to maximize survival rates.

712

## 713 **Immunostaining and imaging of embryonic and postnatal tissue**

714 Embryonic (E) age 11.5 mouse embryos were collected in ice-cold PBS, fixed in fresh 4%  
715 formaldehyde (FA) overnight at 4°C, placed in 30% sucrose overnight at 4°C and embedded  
716 in Tissue-Tek® O.C.T.<sup>TM</sup> (Sakura). 20  $\mu$ m thick sections were cut using a NX70 Cryostat  
717 (ThermoFisher Scientific) and thaw-mounted onto Superfrost Plus<sup>TM</sup> microscope slides  
718 (ThermoFisher Scientific). Postnatal mice were sacrificed by isoflurane overdose followed by  
719 transcardial perfusion with ice cold PBS followed by 4% FA. Brains were postfixed in 4% FA  
720 overnight and 50  $\mu$ m sections prepared using a VT1000S vibratome (Leica). Frozen and free-  
721 floating tissue sections were incubated with blocking/permeabilization buffer (5% donkey  
722 serum and 0.3% Triton X-100 in DPBS) and immunostained with antibodies against EGFP  
723 (chicken, 1:2000, Aves Labs, AB\_2307313), NeuN (rabbit, 1:500, Atlas Antibodies,  
724 AB\_10602305), Sox9 (goat, 1:300, R&D Systems, AB\_2194160), Sox10 (goat, 1:300, R&D  
725 Systems, AB\_442208) or Iba1 (rabbit, 1:500, Wako, AB\_839504) at 4°C overnight. Sections  
726 were washed three times with DPBS and incubated with fluorophore-conjugated secondary

727 antibodies (1:500) and DAPI (1 µg/ml) in blocking buffer at room temperature for one hour.  
728 Sections were washed three times with DPBS and mounted in ProLong® Diamond Antifade  
729 Mountant (ThermoFisher Scientific). Confocal images were captured using a laser scanning  
730 confocal microscope (LSM700, Carl Zeiss) using a Plan-Apochromat 10x/0.45 or 20x/0.8  
731 objective. Image processing and analysis was performed using the software Fiji<sup>70</sup>.

732

### 733 **Single-cell dissociations and flow cytometry**

734 Mice were sacrificed with an overdose of isoflurane, followed by transcardial perfusion with  
735 ice cold artificial cerebrospinal fluid (aCSF: 87 mM NaCl, 2.5 mM KCl, 1.25 mM NaH<sub>2</sub>PO<sub>4</sub>,  
736 26 mM NaHCO<sub>3</sub>, 75 mM sucrose, 20 mM glucose, 2 mM CaCl<sub>2</sub>, 2 mM MgSO<sub>4</sub>). Mice were  
737 decapitated, the brain was collected in ice-cold aCSF, 1 mm coronal slices collected using an  
738 acrylic brain matrix for mouse (World Precision Instruments) and the regions of interest  
739 microdissected under a stereo microscope with a cooled platform. Tissue pieces were  
740 dissociated using the Papain dissociation system (Worthington Biochemical) with an  
741 enzymatic digestion step of 20-30 min followed by manual trituration using fire polished  
742 Pasteur pipettes. Dissociated tissue pieces were filtered through a sterile 30 µm aCSF-  
743 equilibrated Filcon strainer (BD Biosciences) into a 15 ml centrifuge tube containing 9 ml of  
744 aCSF and 0.5% BSA. The suspension was mixed well, cells were pelleted in a cooled  
745 centrifuge at 300g for 5 min, supernatant carefully removed, and cells resuspended in 1 ml  
746 aCSF containing reconstituted ovomucoid protease inhibitor with bovine serum albumin. A  
747 discontinuous density gradient was prepared by carefully overlaying 2 ml undiluted albumin-  
748 inhibitor solution with 1 ml of cell suspension followed by centrifugation at 100g for 6 minutes  
749 at 4°C. The supernatant was carefully removed, the cell pellet resuspended in 1 ml aCSF  
750 containing 0.5% BSA and the cell suspension transferred to a round bottom tube (BD  
751 Biosciences) for flow cytometry. Single EGFP<sup>+</sup> cells were sorted on a BD Influx equipped  
752 with a 140 µm nozzle and a cooling unit with a sample temperature of 4°C and collected into  
753 a DNA LoBind tube (Eppendorf) containing aCSF with 0.5% BSA. All EGFP<sup>+</sup> cells per  
754 sample were sorted and pelleted in a cooled centrifuge at 300g for 5 min. The supernatant was  
755 carefully removed, the cell pellet resuspended in a minimal volume of aCSF and the cell  
756 concentration determined using a Bürker chamber. Importantly, aCSF equilibrated in 95% O<sub>2</sub>/  
757 5% CO<sub>2</sub> was used in all steps, and cells were kept on ice or at 4 °C at all times except for  
758 enzymatic digestion.

759

### 760 **Bulk profiling of barcoded brain cells**

761 To assess the number of successfully integrated barcodes in a typical experiment we isolated  
762 genomic DNA from transduced cells for bulk sequencing of the cloneID locus. Briefly, E9.5  
763 mouse embryonic forebrains were injected as described above, embryos were collected at  
764 E15.5, decapitated and brains transferred into cold 1x HBSS on ice. Whole embryonic brains  
765 were cut into small pieces and processed as described above with the exception of a shorter  
766 enzymatic digestion step of 10 min. About 1,000 EGFP+ cells were sorted on a BD Influx (see  
767 above), collected into a 96-well plate containing 5.6  $\mu$ l cell lysis buffer, followed by a 10-  
768 minute incubation step on ice and addition of 2.8  $\mu$ l neutralization buffer. The entire lysate was  
769 used for PCR amplification and indexing of cloneIDs using the primers in **Supplementary**  
770 **Table 1** and the PCR protocol in **Supplementary Table 2**.

771 The resulting libraries were sequenced on an Illumina NextSeq (**Supplementary Table 3**),  
772 sequencing reads were aligned against a reference containing the 30 bp cloneID and flanking  
773 regions using the BWA-MEM algorithm<sup>68</sup>. A custom BASH script was used to extract unique  
774 cloneIDs with corresponding read counts and cloneIDs with reads in 0.9 quantile were kept.

775

#### 776 **Single-cell RNA-seq**

777 Two brains (brains 1-2) were processed using the 10X Genomics Chromium Single Cell Kit  
778 Version 2 (v2) and three brains (brains 3-5) using the 10X Genomics Chromium Single Cell  
779 Kit Version 3 (v3) (**Supplementary Table 3**). Suspensions from barcoded brains were  
780 prepared as described above, counted and resuspended in aCSF and added to 10x Chromium RT  
781 mix. Suspensions from control brains prepared as described above and diluted in aCSF to  
782 concentrations between 800-1000 cells/ $\mu$ l and added to 10x Chromium RT mix. For  
783 downstream cDNA synthesis (12 PCR cycles), library preparation, and sequencing, we  
784 followed the manufacturer's instructions.

785

#### 786 **Data normalization and cell filtering for single-cell RNA-seq**

787 Overall, three regions from four barcoded brains and from one control brain were sequenced  
788 using 10X Chromium v2 or v3. Because the number of cells per region for the control brain  
789 were much higher than the corresponding number of cells for any barcoded brain  
790 (**Supplementary Table 3**), we downsampled the control datasets to about 9,000 cells (cortex),  
791 8,000 cells (hippocampus) and 7,000 cells (striatum). The gene expression matrices obtained  
792 after running cellranger count were merged by region (cortex, striatum, hippocampus) using  
793 merge() in Seurat v3 (ref<sup>71</sup>). All genes expressed in  $\sim$ 0.1% of all cells were kept and all cells  
794 expressing 500 to 10000 genes were kept in the merged data. The data were log-normalized  
795 with a scale factor of 10000 using the NormalizeData() function followed by linear

796 transformation (scaling) of data. Doublet removal was done using mutually exclusive markers  
797 for various cell types (Igf2, Pf4, Hexb, Rsph1, Pdgfra, Bmp4, Mog, Clic6, Rgs5, Cldn5, Reln,  
798 Igfbp11, Slc32a1, Slc17a7, Aldoc). A cell cycle score was assigned to each cell and the  
799 difference between the G2M and S phase scores was regressed out. Highly variable features  
800 were selected using FindVariableFeatures() followed by PCA and the use of significant PCs  
801 (usually 10-30) for graph-based clustering (SNN graph calculation and clustering using  
802 Louvain). After determining differentially expressed genes, we manually assigned major cell  
803 classes to each cluster (Astroependymal, Immune, Neurons, Oligodendrocytes, Vascular) using  
804 canonical markers. We then split cells by major cell type, performed subclustering and  
805 extensively annotated each cluster based on canonical marker genes from published data and  
806 from [www.mousebrain.org](http://www.mousebrain.org)<sup>3</sup>. At each step, we removed (1) clusters classified with ambiguous  
807 labels and (2) outlier cells on the fringes of clusters in UMAP space to further eliminate  
808 doublets. We annotated clusters using the same mnemonic identifiers as provided on  
809 [www.mousebrain.org](http://www.mousebrain.org) and added corresponding cell type location and general description as  
810 metadata. Finally, we merged all cells into a single file together with metadata and annotations.  
811 The filtered cellIDs were exported and used as input for cloneID extraction and clone calling  
812 using the TREX Python pipeline (see below). Following clone calling, the obtained cloneIDs  
813 were added as metadata to each Seurat object.

814

### 815 **Biological pathway analysis between barcoded and control samples**

816 Lentivirus vectors are derived from the human immunodeficiency virus type 1 (HIV-1)<sup>72</sup>. To  
817 investigate the effect of lentivirus transduction on cellular physiology, we analysed genes  
818 expressed during virus infection which included 195 genes involved in TLR signalling, TNF  
819 signalling, chemokine signalling, MHC presentation, cell cycle and apoptosis (KEGG  
820 pathway: mmu05170). Because our dataset contained an imbalanced number of cells per major  
821 cell type (astroependymal, immune, neurons, oligodendrocytes) and condition (non-injected  
822 control, lentivirus/barcoded), we downsampled the dataset such that each cell type per  
823 condition (e.g. “neurons\_control” and “neurons\_lenti”) contained an equal number of cells. We  
824 plotted expression values of non-zero expressed genes (n = 195) related to virus infection for  
825 single cells as heatmaps grouped by condition or major cell type. For each cell type, we  
826 analysed differentially expressed between both conditions ( $\log_{2}(\text{fold change}) \geq 1$ ) on normalized  
827 and variance stabilized downsampled datasets.

828

### 829 **CloneID enrichment from cDNA for single-cell RNA-seq**

830 A nested PCR strategy on full length cDNA obtained during the first steps of 10X Genomics  
831 Chromium Single Cell Kit Version 3 library preparation was employed for enrichment of  
832 cloneIDs (**Extended data Fig. 7a**) using the primers listed in **Supplementary Table 1**. Briefly,  
833 full length cDNA was used as a template for PCR1 with primer pair MRX1587/14 followed  
834 by purification and PCR2 on the purified product with primer pair MRX1587/1588. Finally,  
835 1% of the purified PCR2 product was used for indexing with MRX1589 and a unique i7 index  
836 primer from the Chromium i7 Multiplex Kit (10X Genomics) (**Supplementary Table 1-3**).  
837 Each amplicon library was sequenced on a MiSeq or NovaSeq6000 (**Supplementary Table**  
838 **3**). We used Cell Ranger count for data processing of amplicon libraries and the TREX (see  
839 below) to extract cloneIDs as done for transcriptome expression libraries.

840

#### 841 **Extraction of cloneIDs and clone calling for single-cell RNA-seq**

842 Raw 10X Genomics Chromium Version 2 or 3 sequencing data were preprocessed with Cell  
843 Ranger v3.0.1. As reference for read mapping, Cell Ranger was configured to use a custom  
844 reference consisting of the GRCm38 (mm10) genome and an additional sequence representing  
845 the H2B-EGFP-N transgene, in which the cloneID region was marked with "N" wildcard  
846 characters. The resulting BAM file of aligned sequencing reads was then processed with  
847 TREX, our custom Python tool for cloneID extraction and clone calling. TREX uses only reads  
848 from filtered cells (see above) that align to the H2B-EGFP-N transgene. CloneIDs are  
849 recovered from those alignments that cover the masked cloneID region. If soft clipping is  
850 encountered at one of the bases adjacent to the region, the alignment is assumed to continue  
851 ungapped into the region. All cloneIDs with identical UMIs that come from the same cell (have  
852 the same cellID) are collapsed to a consensus sequence. To error-correct cloneIDs, they are  
853 single-linkage clustered using a Hamming distance of at most five as linking criterion. In each  
854 cluster, all its cloneIDs are replaced with the cloneID occurring most frequently in that cluster.  
855 From the resulting final cellID-cloneID combinations, those that are only supported by one  
856 UMI and one read are discarded. Also removed are cloneIDs that are supported by only one  
857 UMI and have a high frequency in another cell. We assume that those cloneIDs are  
858 contaminations.

859 The cleaned data are transformed into a count matrix showing UMI counts for each cloneID in  
860 each cell. This matrix is used to sort cells into clones of cells with similar cloneID  
861 combinations. Clonally related cells were identified as described previously<sup>18</sup>. Briefly, the  
862 Jaccard similarity between each pair of cloneID expressing cells was calculated using the R  
863 package proxy<sup>73</sup>. A Jaccard score of 0.7 was used as a cut-off for related cells and clones were

864 defined as groups of two or more related cells. CloneIDs were added as metadata to each  
865 dataset.

866

### 867 **Calculation of clonal coupling scores**

868 For each brain we calculated clonal coupling scores defined as the number of shared cloneIDs  
869 relative to randomized data<sup>23</sup> considering all clones containing at least 3 cells per clone. We  
870 randomized the clone-cell type associations, while preserving the number of cell types related  
871 to each clone, and the number of clones related to each cell type, to create 1000 randomized  
872 data sets<sup>74</sup>. This allowed us to estimate the number of overlaps expected to occur by chance.  
873 We compared the observed clonal data to randomized data sets to obtain empirical p-values  
874 and z-scores. These indicate, for each pair of cell types, how often we expect to see the  
875 observed clonal association yielding values that range from positive (clonally related cells) to  
876 negative (clonally unrelated cells). To summarize the clonal coupling scores for four brains,  
877 we kept only cell types found in clones in all brains. For each brain, the Pearson correlations  
878 of z-scores between each pair of cell types were calculated, the correlation coefficients were  
879 transformed using Fisher Z-transformation and averaged to represent clonal coupling scores  
880 for all brains.

881

### 882 **Tissue processing and library preparation for Spatial Transcriptomics**

883 Mice were sacrificed with an overdose of isoflurane, followed by transcardial perfusion with  
884 ice cold artificial cerebrospinal fluid (aCSF: 87 mM NaCl, 2.5 mM KCl, 1.25 mM NaH<sub>2</sub>PO<sub>4</sub>,  
885 26 mM NaHCO<sub>3</sub>, 75 mM sucrose, 20 mM glucose, 2 mM CaCl<sub>2</sub>, 2 mM MgSO<sub>4</sub>). Mice were  
886 decapitated, the brain was collected in ice-cold aCSF, transferred to ice-cold Tissue-  
887 Tek® O.C.T.<sup>TM</sup> (Sakura) and snap frozen at -40°C in a bath of isopentane and dry ice. Eight  
888 consecutive 10 µm sections around AP -1.65 mm from Bregma were collected for processing  
889 using the 10X Genomics Visium Spatial Gene Expression kit.

890 The first four sections (V9-V12) were fixed in ice-cold methanol followed by rapid imaging  
891 (< 15 min for all sections) of EGFP and transmitted light signal using an epifluorescence  
892 microscope (Axio Imager.Z2, Carl Zeiss) equipped with a Plan-Neofluar 10x/0.3 M27  
893 objective before further processing following the manufacturer's instructions. The remaining  
894 four sections (V13-V16) were fixed in ice-cold methanol, briefly rinsed with DPBS, incubated  
895 with DPBS containing DAPI (1 µg/ml), FluoTag®-X4 anti-GFP conjugated to Atto488 (1:200,  
896 NanoTag Biotechnologies), NeuN-Alexa568 (rabbit, 1:400, Abcam, ab207282), Olig2-  
897 Alexa647 (rabbit, 1:200, Abcam, ab225100) and RNaseOUT<sup>TM</sup> (1 U/µl) at room temperature  
898 for 10 min. The sections were washed two times for 1 min with DPBS containing



899 RNaseOUT™ (1 U/μl), mounted in 85% glycerol containing RNaseOUT™ (1 U/μl) and  
900 images were captured for all four fluorescent channels as well as the transmitted light channel.  
901 The coverslip was removed by immersing the slide in water, the slide was dried for 5 min at  
902 37°C and further processed following the manufacturer's instructions starting with the tissue  
903 permeabilization step.

904

### 905 **Data and image analysis for Spatial Transcriptomics**

906 For each coronal brain section, the registered microscope image was used for manual alignment  
907 and tissue detection using the Visium Manual Alignment Wizard (10X Genomics) followed by  
908 running Space Ranger to obtain a gene expression matrix for each section (**Supplementary**  
909 **Table 3**). Each dataset was separately processed in Seurat v3 (ref.<sup>71</sup>) and only spots that  
910 expressed at least 300 genes were kept. We used SCTransform<sup>75</sup> to normalize the data and  
911 detect high-variance features followed by dimensionality reduction, clustering, visualization in  
912 UMAP space and identification of spatially variable gene expression. The transcriptomic  
913 profiles of capture spots in each dataset were integrated with the merged v3 single-cell RNA-  
914 seq dataset to predict the underlying composition of cell types. Finally, all datasets were  
915 merged, spot IDs were exported and used as input for cloneID extraction and clone calling  
916 using TREX.

917 Fluorescent images acquired for four sections (V13-V16) were processed in R using a custom  
918 segmentation workflow (<https://github.com/ludvigla/TREXSeg>) that entails (1) 2D FFT  
919 convolution filtering, (2) image correction, (3) thresholding, (4) removal of speckles or other  
920 abnormal shapes and (5) watershedding to identify and label cells. The segmentation workflow  
921 was applied to each of three channels EGFP (barcoded cells), NeuN (neurons) and Olig2  
922 (oligodendrocytes). To find co-localizing signals across two channels A and B, an overlap  
923 score was estimated for all pairs of nuclei ( $i, j$ ) as  $\text{intersect}(A_i, B_j) / \min(A_i, B_j)$  where  $A_i$  and  $B_j$   
924 are the sets of pixels defining nuclei  $i$  and  $j$ . An overlap score of at least 50% was used to  
925 determine if the signal originated from the same nuclei. For alignment of all four sections, we  
926 used a manual image registration method implemented in the ManualAlignImages function  
927 from the STUtility package<sup>76</sup>. Briefly, the raw NeuN images were first masked distinguish the  
928 tissue from the background and to detect the tissue edges. The detected tissue edges were then  
929 manually rotated or shifted using the manual registration tool to fit the image and spot  
930 coordinates images V14-V16 to the reference image V13. All capture spot coordinates from  
931 V14-V16 were transformed to align with the coordinate system of V13 using the learned  
932 transformation functions. The same transformations were applied to the coordinates of the  
933 previously segmented nuclei in V14-V16. We calculated the pairwise 2D Euclidean distances

934 between aligned spots and nuclei and selected the cell with shortest distance to the centroid  
935 position of each cloneID+ spot for assignment of cell type identity. For alignment of all four  
936 H&E stained sections (V9-V12), we used an automated image registration method  
937 implemented in the AlignImages function from STUtility with image V9 as reference. Similar  
938 to the manual registration method described above, the automatic registration uses masked  
939 H&E images to find a transformation function that minimizes the difference between the pixels  
940 outlining the tissue edges which is solved using an Iterative Closest Point (ICP) algorithm. All  
941 capture spot coordinates from V10-V12 were transformed to align with the coordinate system  
942 of V9 using the learned transformation function.

943 Registration of aligned images of brain tissue sections to the standardized Allen Mouse Brain  
944 Atlas (ABA) was done using WholeBrain<sup>48</sup>. We used an extended and inverted version of the  
945 H&E target image V9 and the NeuN target image V13 with Bregma coordinates AP -1.65 mm  
946 for registration of an entire brain section to the ABA. Anatomical information and ABA color  
947 codes were added to the merged Spatial Transcriptomics dataset and plotted using custom  
948 functions.

949

### 950 **CloneID enrichment from cDNA for Spatial Transcriptomics**

951 A nested PCR strategy on full length cDNA obtained during the first steps of 10X Genomics  
952 Visium Spatial Gene Expression library preparation was employed for enrichment of cloneIDs  
953 using the primers listed in **Supplementary Table 1**. Briefly, unfragmented cDNA was used as  
954 a template for PCR1 with primer pair MRX1587/14 followed by purification and PCR2 on the  
955 purified product with primer pair MRX1587/1805 (**Supplementary Table 1-2**). Finally, 1%  
956 of the purified PCR2 product was used for dual indexing with Visium Dual Index primers (10X  
957 Genomics) (**Supplementary Table 3**). Each amplicon library was sequenced on a NextSeq  
958 (**Supplementary Table 3**).

959

### 960 **Extraction of cloneIDs and clone calling for Spatial Transcriptomics**

961 Raw 10X Genomics Visium sequencing data from transcriptome and amplicon libraries  
962 (**Supplementary Table 3**) were preprocessed with Space Ranger v1.0. The pipeline included  
963 an alignment step where sequencing reads were mapped to the mm10 transcriptome and to an  
964 additional chromosome representing the H2B-EGFP-N transgene. Aligned sequencing reads  
965 of all spots were subjected to TREX for cloneID extraction as described above. From the  
966 resulting final spotID-cloneID combinations, only those cloneIDs supported by at least one  
967 UMI and more than one read are kept. Clone calling was performed based on Jaccard similarity  
968 as described above and cloneIDs were added as metadata to each dataset in Seurat.

969

## 970 **Overview of software and packages used in this study**

971 The following and R software<sup>77</sup> packages and libraries were used: BiRewire<sup>74</sup>, cowplot<sup>78</sup>,  
972 dplyr<sup>79</sup>, EBImage<sup>80</sup>, eulerr<sup>81</sup>, ggplot2 (ref.<sup>82</sup>), magick<sup>83</sup>, magrittr<sup>84</sup>, Matrix<sup>85</sup>, pheatmap<sup>86</sup>,  
973 proxy<sup>73</sup>, RColorBrewer<sup>87</sup>, reshape2 (ref.<sup>88</sup>), rgl<sup>89</sup>, SDMTools<sup>90</sup>, Seurat<sup>75</sup>, STutility<sup>76</sup>,  
974 tidyverse<sup>91</sup>, umap<sup>92</sup>, wholebrain<sup>48</sup>, zeallot<sup>93</sup>. The following Python software  
975 (<https://www.python.org>) packages and libraries were used: AmpUMI<sup>94</sup>, Loompy  
976 (<http://loompy.org>), NumPy<sup>95</sup>, Pandas<sup>96</sup>, Pysam ([https://github.com/pysam-](https://github.com/pysam-developers/pysam)  
977 [developers/pysam](https://github.com/pysam-developers/pysam)), Tinalign (<https://github.com/marcelm/tinalign>), xopen  
978 (<https://github.com/marcelm/xopen>).

979

## 980 **Data availability**

981 All RNA sequencing datasets generated in this study are deposited in the Gene Expression  
982 Omnibus (GEO) under accession code GSE153424. All processed single-cell and spatial  
983 transcriptomics datasets are available as RDS files using link [https://kise-](https://kise-my.sharepoint.com/:f/g/personal/michael_ratz_ki_se/EndBZ9VI_rRHmHzZxrAwSZQBeE9e4RNmktbuCcHir1a5qQ?e=Ge2Fqm)  
984 [my.sharepoint.com/:f/g/personal/michael\\_ratz\\_ki\\_se/EndBZ9VI\\_rRHmHzZxrAwSZQBeE9](https://kise-my.sharepoint.com/:f/g/personal/michael_ratz_ki_se/EndBZ9VI_rRHmHzZxrAwSZQBeE9e4RNmktbuCcHir1a5qQ?e=Ge2Fqm)  
985 [e4RNmktbuCcHir1a5qQ?e=Ge2Fqm](https://kise-my.sharepoint.com/:f/g/personal/michael_ratz_ki_se/EndBZ9VI_rRHmHzZxrAwSZQBeE9e4RNmktbuCcHir1a5qQ?e=Ge2Fqm) and password 8RMG.xbzH?3v9Ef4.

986

## 987 **Code availability**

988 TREX source code is available under the MIT license from [https://github.com/frisen-](https://github.com/frisen-lab/TREX)  
989 [lab/TREX](https://github.com/frisen-lab/TREX). Image segmentation and alignment code is available under the MIT license from  
990 <https://github.com/ludvigla/TREXSeg>.

991

## 992 **Author contributions**

993 MR led experimental work, generated and analysed data and prepared figures. LvB developed  
994 the initial barcode extraction pipeline with help from GLM, analysed data, and helped with  
995 experiments supervised by MR. LL developed the cell segmentation and image alignment  
996 pipeline. MM and LvB further improved and expanded functionality of the barcode extraction  
997 pipeline. JOW developed the pipeline for assessing clonal coupling. JF and JL supervised the  
998 study. MR and JF wrote the manuscript with input from all authors.

999

## 1000 **Competing interests**

1001 JF and JL are consultants to 10X Genomics.

1002

1003

1004 **References**

1005

1006 1 Taverna, E., Gotz, M. & Huttner, W. B. The cell biology of neurogenesis: toward an  
1007 understanding of the development and evolution of the neocortex. *Annu Rev Cell Dev*  
1008 *Biol* **30**, 465-502, doi:10.1146/annurev-cellbio-101011-155801 (2014).

1009 2 Gotz, M. & Huttner, W. B. The cell biology of neurogenesis. *Nat Rev Mol Cell Biol* **6**,  
1010 777-788, doi:10.1038/nrm1739 (2005).

1011 3 Zeisel, A. *et al.* Molecular Architecture of the Mouse Nervous System. *Cell* **174**, 999-  
1012 1014 e1022, doi:10.1016/j.cell.2018.06.021 (2018).

1013 4 Tasic, B. *et al.* Shared and distinct transcriptomic cell types across neocortical areas.  
1014 *Nature* **563**, 72-78, doi:10.1038/s41586-018-0654-5 (2018).

1015 5 Ma, J., Shen, Z., Yu, Y.-C. & Shi, S.-H. Neural lineage tracing in the mammalian brain.  
1016 *Current Opinion in Neurobiology* **50**, 7-16,  
1017 doi:<https://doi.org/10.1016/j.conb.2017.10.013> (2018).

1018 6 Kretzschmar, K. & Watt, Fiona M. Lineage Tracing. *Cell* **148**, 33-45,  
1019 doi:10.1016/j.cell.2012.01.002 (2012).

1020 7 Macosko, E. Z. *et al.* Highly Parallel Genome-wide Expression Profiling of Individual  
1021 Cells Using Nanoliter Droplets. *Cell* **161**, 1202-1214, doi:10.1016/j.cell.2015.05.002  
1022 (2015).

1023 8 Zeisel, A. *et al.* Brain structure. Cell types in the mouse cortex and hippocampus  
1024 revealed by single-cell RNA-seq. *Science* **347**, 1138-1142,  
1025 doi:10.1126/science.aaa1934 (2015).

1026 9 Masuda, T. *et al.* Spatial and temporal heterogeneity of mouse and human microglia at  
1027 single-cell resolution. *Nature*, doi:10.1038/s41586-019-0924-x (2019).

1028 10 Hammond, T. R. *et al.* Single-Cell RNA Sequencing of Microglia throughout the  
1029 Mouse Lifespan and in the Injured Brain Reveals Complex Cell-State Changes.  
1030 *Immunity* **50**, 253-271.e256, doi:10.1016/j.immuni.2018.11.004 (2019).

1031 11 Tasic, B. *et al.* Adult mouse cortical cell taxonomy revealed by single cell  
1032 transcriptomics. *Nat Neurosci* **19**, 335-346, doi:10.1038/nn.4216 (2016).

1033 12 Perli, S. D., Cui, C. H. & Lu, T. K. Continuous genetic recording with self-targeting  
1034 CRISPR-Cas in human cells. *Science* **353**, doi:10.1126/science.aag0511 (2016).

1035 13 Kalhor, R., Mali, P. & Church, G. M. Rapidly evolving homing CRISPR barcodes. *Nat*  
1036 *Methods* **14**, 195-200, doi:10.1038/nmeth.4108 (2017).

1037 14 Frieda, K. L. *et al.* Synthetic recording and in situ readout of lineage information in  
1038 single cells. *Nature*, doi:10.1038/nature20777 (2016).

- 1039 15 McKenna, A. *et al.* Whole-organism lineage tracing by combinatorial and cumulative  
1040 genome editing. *Science* **353**, aaf7907, doi:10.1126/science.aaf7907 (2016).
- 1041 16 Kalhor, R. *et al.* Developmental barcoding of whole mouse via homing CRISPR.  
1042 *Science* **361**, eaat9804, doi:10.1126/science.aat9804 (2018).
- 1043 17 Askary, A. *et al.* In situ readout of DNA barcodes and single base edits facilitated by  
1044 in vitro transcription. *Nature biotechnology* **38**, 66-75, doi:10.1038/s41587-019-0299-  
1045 4 (2020).
- 1046 18 Biddu, B. A. *et al.* Single-cell mapping of lineage and identity in direct reprogramming.  
1047 *Nature* **564**, 219-224, doi:10.1038/s41586-018-0744-4 (2018).
- 1048 19 Weinreb, C., Rodriguez-Fraticelli, A., Camargo, F. D. & Klein, A. M. Lineage tracing  
1049 on transcriptional landscapes links state to fate during differentiation. *Science*,  
1050 eaaw3381, doi:10.1126/science.aaw3381 (2020).
- 1051 20 Raj, B. *et al.* Simultaneous single-cell profiling of lineages and cell types in the  
1052 vertebrate brain. *Nature Biotechnology*, doi:10.1038/nbt.4103  
1053 <https://www.nature.com/articles/nbt.4103#supplementary-information> (2018).
- 1054 21 Spanjaard, B. *et al.* Simultaneous lineage tracing and cell-type identification using  
1055 CRISPR-Cas9-induced genetic scars. *Nat Biotechnol* **36**, 469-473,  
1056 doi:10.1038/nbt.4124 (2018).
- 1057 22 Alemany, A., Florescu, M., Baron, C. S., Peterson-Maduro, J. & van Oudenaarden, A.  
1058 Whole-organism clone tracing using single-cell sequencing. *Nature*,  
1059 doi:10.1038/nature25969  
1060 <https://www.nature.com/articles/nature25969#supplementary-information> (2018).
- 1061 23 Wagner, D. E. *et al.* Single-cell mapping of gene expression landscapes and lineage in  
1062 the zebrafish embryo. *Science* **360**, 981-987, doi:10.1126/science.aar4362 (2018).
- 1063 24 Chan, M. M. *et al.* Molecular recording of mammalian embryogenesis. *Nature*,  
1064 doi:10.1038/s41586-019-1184-5 (2019).
- 1065 25 Bowling, S. *et al.* An Engineered CRISPR-Cas9 Mouse Line for Simultaneous Readout  
1066 of Lineage Histories and Gene Expression Profiles in Single Cells. *Cell*,  
1067 doi:<https://doi.org/10.1016/j.cell.2020.04.048> (2020).
- 1068 26 Stahl, P. L. *et al.* Visualization and analysis of gene expression in tissue sections by  
1069 spatial transcriptomics. *Science* **353**, 78-82, doi:10.1126/science.aaf2403 (2016).
- 1070 27 Wang, X. *et al.* Three-dimensional intact-tissue sequencing of single-cell  
1071 transcriptional states. *Science*, doi:10.1126/science.aat5691 (2018).
- 1072 28 Qian, X. *et al.* Probabilistic cell typing enables fine mapping of closely related cell  
1073 types in situ. *Nature Methods* **17**, 101-106, doi:10.1038/s41592-019-0631-4 (2020).

- 1074 29 Huang, L. *et al.* BRICseq Bridges Brain-wide Interregional Connectivity to Neural  
1075 Activity and Gene Expression in Single Animals. *Cell* **182**, 177-188.e127,  
1076 doi:<https://doi.org/10.1016/j.cell.2020.05.029> (2020).
- 1077 30 Calegari, F., Haubensak, W., Haffner, C. & Huttner, W. B. Selective lengthening of the  
1078 cell cycle in the neurogenic subpopulation of neural progenitor cells during mouse brain  
1079 development. *J Neurosci* **25**, 6533-6538, doi:10.1523/JNEUROSCI.0778-05.2005  
1080 (2005).
- 1081 31 Tata, M., Ruhrberg, C. & Fantin, A. Vascularisation of the central nervous system.  
1082 *Mechanisms of Development* **138**, 26-36,  
1083 doi:<https://doi.org/10.1016/j.mod.2015.07.001> (2015).
- 1084 32 Fehse, B., Kustikova, O. S., Bubenheim, M. & Baum, C. Pois(s)on – It's a Question of  
1085 Dose.... *Gene Therapy* **11**, 879-881, doi:10.1038/sj.gt.3302270 (2004).
- 1086 33 Finkelshtein, D., Werman, A., Novick, D., Barak, S. & Rubinstein, M. LDL receptor  
1087 and its family members serve as the cellular receptors for vesicular stomatitis virus.  
1088 *Proceedings of the National Academy of Sciences* **110**, 7306,  
1089 doi:10.1073/pnas.1214441110 (2013).
- 1090 34 Lun, M. P., Monuki, E. S. & Lehtinen, M. K. Development and functions of the choroid  
1091 plexus–cerebrospinal fluid system. *Nature Reviews Neuroscience* **16**, 445-457,  
1092 doi:10.1038/nrn3921 (2015).
- 1093 35 Swinnen, N. *et al.* Complex invasion pattern of the cerebral cortex by microglial cells  
1094 during development of the mouse embryo. *Glia* **61**, 150-163,  
1095 doi:<https://doi.org/10.1002/glia.22421> (2013).
- 1096 36 Thion, M. S., Ginhoux, F. & Garel, S. Microglia and early brain development: An  
1097 intimate journey. *Science* **362**, 185-189, doi:10.1126/science.aat0474 (2018).
- 1098 37 Marín, O. & Müller, U. Lineage origins of GABAergic versus glutamatergic neurons  
1099 in the neocortex. *Curr Opin Neurobiol* **26**, 132-141, doi:10.1016/j.conb.2014.01.015  
1100 (2014).
- 1101 38 Fuentealba, L. C. *et al.* Embryonic Origin of Postnatal Neural Stem Cells. *Cell* **161**,  
1102 1644-1655, doi:10.1016/j.cell.2015.05.041 (2015).
- 1103 39 Bielle, F. *et al.* Multiple origins of Cajal-Retzius cells at the borders of the developing  
1104 pallium. *Nature Neuroscience* **8**, 1002-1012, doi:10.1038/nn1511 (2005).
- 1105 40 Kessaris, N. *et al.* Competing waves of oligodendrocytes in the forebrain and postnatal  
1106 elimination of an embryonic lineage. *Nat Neurosci* **9**, 173-179, doi:10.1038/nn1620  
1107 (2006).

- 1108 41 Berg, D. A. *et al.* A Common Embryonic Origin of Stem Cells Drives Developmental  
1109 and Adult Neurogenesis. *Cell* **177**, 654-668.e615, doi:10.1016/j.cell.2019.02.010  
1110 (2019).
- 1111 42 Iyer, A. & Tole, S. Neuronal diversity and reciprocal connectivity between the  
1112 vertebrate hippocampus and septum. *WIREs Developmental Biology* **9**, e370,  
1113 doi:<https://doi.org/10.1002/wdev.370> (2020).
- 1114 43 Ginhoux, F. *et al.* Fate Mapping Analysis Reveals That Adult Microglia Derive from  
1115 Primitive Macrophages. *Science* **330**, 841, doi:10.1126/science.1194637 (2010).
- 1116 44 Kierdorf, K. *et al.* Microglia emerge from erythromyeloid precursors via Pu.1- and Irf8-  
1117 dependent pathways. *Nature Neuroscience* **16**, 273, doi:10.1038/nn.3318  
1118 <https://www.nature.com/articles/nn.3318#supplementary-information> (2013).
- 1119 45 Goldmann, T. *et al.* Origin, fate and dynamics of macrophages at central nervous  
1120 system interfaces. *Nature Immunology* **17**, 797, doi:10.1038/ni.3423  
1121 <https://www.nature.com/articles/ni.3423#supplementary-information> (2016).
- 1122 46 Gomez Perdiguero, E. *et al.* Tissue-resident macrophages originate from yolk-sac-  
1123 derived erythro-myeloid progenitors. *Nature* **518**, 547-551, doi:10.1038/nature13989  
1124 (2015).
- 1125 47 Lein, E. S. *et al.* Genome-wide atlas of gene expression in the adult mouse brain. *Nature*  
1126 **445**, 168-176, doi:10.1038/nature05453 (2007).
- 1127 48 Furth, D. *et al.* An interactive framework for whole-brain maps at cellular resolution.  
1128 *Nat Neurosci* **21**, 139-149, doi:10.1038/s41593-017-0027-7 (2018).
- 1129 49 Marin, O. & Rubenstein, J. L. Cell migration in the forebrain. *Annu Rev Neurosci* **26**,  
1130 441-483, doi:10.1146/annurev.neuro.26.041002.131058 (2003).
- 1131 50 Bergles, D. E. & Richardson, W. D. Oligodendrocyte Development and Plasticity. *Csh*  
1132 *Perspect Biol* **8**, a020453-a020453, doi:10.1101/cshperspect.a020453 (2015).
- 1133 51 Smolders, S. M.-T. *et al.* Microglia: Brain cells on the move. *Progress in Neurobiology*  
1134 **178**, 101612, doi:<https://doi.org/10.1016/j.pneurobio.2019.04.001> (2019).
- 1135 52 Verney, C., Monier, A., Fallet-Bianco, C. & Gressens, P. Early microglial colonization  
1136 of the human forebrain and possible involvement in periventricular white-matter injury  
1137 of preterm infants. *Journal of Anatomy* **217**, 436-448, doi:10.1111/j.1469-  
1138 7580.2010.01245.x (2010).
- 1139 53 Kettenmann, H., Hanisch, U.-K., Noda, M. & Verkhratsky, A. Physiology of Microglia.  
1140 *Physiological Reviews* **91**, 461-553, doi:10.1152/physrev.00011.2010 (2011).
- 1141 54 Li, Q. & Barres, B. A. Microglia and macrophages in brain homeostasis and disease.  
1142 *Nature Reviews Immunology* **18**, 225-242, doi:10.1038/nri.2017.125 (2018).

- 1143 55 Kebschull, J. M. & Zador, A. M. Cellular barcoding: lineage tracing, screening and  
1144 beyond. *Nature Methods* **15**, 871-879, doi:10.1038/s41592-018-0185-x (2018).
- 1145 56 Llorca, A. *et al.* A stochastic framework of neurogenesis underlies the assembly of  
1146 neocortical cytoarchitecture. *eLife* **8**, e51381, doi:10.7554/eLife.51381 (2019).
- 1147 57 Hagemann-Jensen, M. *et al.* Single-cell RNA counting at allele and isoform resolution  
1148 using Smart-seq3. *Nature Biotechnology* **38**, 708-714, doi:10.1038/s41587-020-0497-  
1149 0 (2020).
- 1150 58 Graybuck, L. T. *et al.* Enhancer viruses for combinatorial cell-subclass-specific  
1151 labeling. *Neuron*, doi:https://doi.org/10.1016/j.neuron.2021.03.011 (2021).
- 1152 59 Lin, M. Z. & Schnitzer, M. J. Genetically encoded indicators of neuronal activity.  
1153 *Nature neuroscience* **19**, 1142-1153, doi:10.1038/nn.4359 (2016).
- 1154 60 Kim, C. K., Adhikari, A. & Deisseroth, K. Integration of optogenetics with  
1155 complementary methodologies in systems neuroscience. *Nat Rev Neurosci* **18**, 222-  
1156 235, doi:10.1038/nrn.2017.15 (2017).
- 1157 61 Sternson, S. M. & Roth, B. L. Chemogenetic Tools to Interrogate Brain Functions.  
1158 *Annual Review of Neuroscience* **37**, 387-407, doi:10.1146/annurev-neuro-071013-  
1159 014048 (2014).
- 1160 62 Yu, Y.-C. *et al.* Preferential electrical coupling regulates neocortical lineage-dependent  
1161 microcircuit assembly. *Nature* **486**, 113-117, doi:10.1038/nature10958 (2012).
- 1162 63 Li, Y. *et al.* Clonally related visual cortical neurons show similar stimulus feature  
1163 selectivity. *Nature* **486**, 118-121, doi:10.1038/nature11110 (2012).
- 1164 64 Beronja, S., Livshits, G., Williams, S. & Fuchs, E. Rapid functional dissection of  
1165 genetic networks via tissue-specific transduction and RNAi in mouse embryos. *Nature*  
1166 *Medicine* **16**, 821-U128, doi:10.1038/nm.2167 (2010).
- 1167 65 Konermann, S. *et al.* Genome-scale transcriptional activation by an engineered  
1168 CRISPR-Cas9 complex. *Nature* **517**, 583-588, doi:10.1038/nature14136 (2015).
- 1169 66 Matlashov, M. E. *et al.* A set of monomeric near-infrared fluorescent proteins for  
1170 multicolor imaging across scales. *Nat Commun* **11**, 239, doi:10.1038/s41467-019-  
1171 13897-6 (2020).
- 1172 67 Gibson, D. G. *et al.* Enzymatic assembly of DNA molecules up to several hundred  
1173 kilobases. *Nat Methods* **6**, 343-345, doi:10.1038/nmeth.1318 (2009).
- 1174 68 Li, H. Aligning sequence reads, clone sequences and assembly contigs with BWA-  
1175 MEM. *arXiv preprint arXiv:1303.3997* (2013).



- 1176 69 Kebschull, J. M. *et al.* High-Throughput Mapping of Single-Neuron Projections by  
1177 Sequencing of Barcoded RNA. *Neuron* **91**, 975-987, doi:10.1016/j.neuron.2016.07.036  
1178 (2016).
- 1179 70 Schindelin, J. *et al.* Fiji: an open-source platform for biological-image analysis. *Nature*  
1180 *Methods* **9**, 676-682, doi:10.1038/nmeth.2019 (2012).
- 1181 71 Stuart, T. *et al.* Comprehensive Integration of Single-Cell Data. *Cell* **177**, 1888-1902  
1182 e1821, doi:10.1016/j.cell.2019.05.031 (2019).
- 1183 72 Naldini, L., Trono, D. & Verma, I. M. Lentiviral vectors, two decades later. *Science*  
1184 **353**, 1101, doi:10.1126/science.aah6192 (2016).
- 1185 73 Meyer, D. & Buchta, C. proxy: Distance and Similarity Measures. *R package version*  
1186 *0.4-23* (2019).
- 1187 74 Iorio, F. *et al.* Efficient randomization of biological networks while preserving  
1188 functional characterization of individual nodes. *BMC Bioinformatics* **17**, 542,  
1189 doi:10.1186/s12859-016-1402-1 (2016).
- 1190 75 Hafemeister, C. & Satija, R. Normalization and variance stabilization of single-cell  
1191 RNA-seq data using regularized negative binomial regression. *Genome Biology* **20**,  
1192 296, doi:10.1186/s13059-019-1874-1 (2019).
- 1193 76 Bergenstråhle, J., Larsson, L. & Lundeberg, J. Seamless integration of image and  
1194 molecular analysis for spatial transcriptomics workflows. *BMC Genomics* **21**, 482,  
1195 doi:10.1186/s12864-020-06832-3 (2020).
- 1196 77 Team, R. C. R: A Language and Environment for Statistical Computing. (2019).
- 1197 78 Wilke, C. O. cowplot: Streamlined Plot Theme and Plot Annotations for 'ggplot2'.  
1198 (2019).
- 1199 79 Wickham, H., François, R., Henry, L. & Müller, K. dplyr: A Grammar of Data  
1200 Manipulation. (2020).
- 1201 80 Pau, G., Fuchs, F., Sklyar, O., Boutros, M. & Huber, W. EBImage--an R package for  
1202 image processing with applications to cellular phenotypes. *Bioinformatics* **26**, 979-981,  
1203 doi:10.1093/bioinformatics/btq046 (2010).
- 1204 81 Larsson, J. eulerr: Area-Proportional Euler and Venn Diagrams with Ellipses. *R*  
1205 *package version 6.0.0* (2019).
- 1206 82 Wickham, H. ggplot2: Elegant Graphics for Data Analysis. *Springer-Verlag New York*  
1207 (2016).
- 1208 83 Ooms, J. magick: Advanced Graphics and Image-Processing in R. (2020).
- 1209 84 Bache, S. M. & Wickham, H. magrittr: A Forward-Pipe Operator for R. (2014).

- 1210 85 Bates, D. & Maechler, M. Matrix: Sparse and Dense Matrix Classes and Methods.  
1211 (2019).
- 1212 86 Kolde, R. pheatmap: Pretty Heatmaps. *R package version 1.0.12* (2019).
- 1213 87 Neuwirth, E. RColorBrewer: ColorBrewer Palettes. (2014).
- 1214 88 Wickham, H. Reshaping Data with the reshape Package. *2007* **21**, 20,  
1215 doi:10.18637/jss.v021.i12 (2007).
- 1216 89 Adler, D. & Murdoch, D. rgl: 3D Visualization Using OpenGL. (2020).
- 1217 90 VanDerWal, J., Falconi, L., Januchowski, S., Shoo, L. & Storlie, C. SDMTTools:  
1218 Species Distribution Modelling Tools: Tools for processing data associated with  
1219 species distribution modelling exercises. (2019).
- 1220 91 Wickham, H. *et al.* Welcome to the tidyverse. *Journal of Open Source Software* **4**(43)  
1221 (2019).
- 1222 92 Konopka, T. umap: Uniform Manifold Approximation and Projection. (2020).
- 1223 93 Teetor, N. zeallot: Multiple, Unpacking, and Destructuring Assignment. (2018).
- 1224 94 Clement, K., Farouni, R., Bauer, D. E. & Pinello, L. AmpUMI: design and analysis of  
1225 unique molecular identifiers for deep amplicon sequencing. *Bioinformatics* **34**, i202-  
1226 i210, doi:10.1093/bioinformatics/bty264 (2018).
- 1227 95 Walt, S. v. d., Colbert, S. C. & Varoquaux, G. The NumPy Array: A Structure for  
1228 Efficient Numerical Computation. *Computing in Science & Engineering* **13**, 22-30,  
1229 doi:10.1109/MCSE.2011.37 (2011).
- 1230 96 McKinney, W. Data Structures for Statistical Computing in Python. *PROC. OF THE*  
1231 *9th PYTHON IN SCIENCE CONF. (SCIPY 2010)*, 56 - 61, doi:10.25080/Majora-  
1232 92bf1922-00a (2010).
- 1233

1234 **Acknowledgments**

1235 We thank Enric Llorens-Bobadilla, Igor Adameyko, Robert Harris, Konstantinos Meletis and  
1236 Daniel Sheward for critical discussions; Lola Buades for help with drawing Figure 1a and  
1237 Extended Data Fig. 2e; Sarantis Giatrellis for FACS assistance; Maria Genander and Christina  
1238 Kantzer for the LV-GFP construct; Ilaria Testa for the emiRFP670 plasmid; the lab of Rickard  
1239 Sandberg for access to NextSeq; the National Genomics Infrastructure in Stockholm funded  
1240 by Science for Life Laboratory, the Knut and Alice Wallenberg Foundation and the Swedish  
1241 Research Council for sequencing services; SNIC/Uppsala Multidisciplinary Centre for  
1242 Advanced Computational Science for assistance with massively parallel sequencing and access  
1243 to the UPPMAX computational infrastructure; ultrasound-guided *in utero* injections were  
1244 performed by the Infinigene core facility and lentivirus production was done by the VirusTech  
1245 core facility at Karolinska Institutet or GEG-Tech (Paris, France). JOW and MM are financially  
1246 supported by the Knut and Alice Wallenberg Foundation as part of the National Bioinformatics  
1247 Infrastructure Sweden at SciLifeLab. This study was supported by grants from the Swedish  
1248 Research Council, the Swedish Cancer Society, the Swedish Foundation for Strategic  
1249 Research, Knut och Alice Wallenbergs Stiftelse and the ERC to JF and a DFG Research  
1250 Fellowship (RA 2889/1-1) to MR.
